# Supplementary material
Source: PubMed Central journal article supplement (PMC3071593)
Supplement: NIHMS250457-supplement-01.pdf [file NIHMS250457-supplement-01.pdf]

# Supporting Information For:

## An Efficient Synthesis of $\gamma$ -Hydroxy- $\alpha,\beta$ -unsaturated Aldehydic Esters of 2-Lysophosphatidylcholine

*Jaewoo Choi, James M. Laird and Robert G. Salomon\**

Department of Chemistry, Case Western Reserve University, Cleveland, Ohio 44106-7078

## Contents

|                                                                                                                                                                                                |     |
|------------------------------------------------------------------------------------------------------------------------------------------------------------------------------------------------|-----|
| Title                                                                                                                                                                                          | S1  |
| Contents                                                                                                                                                                                       | S2  |
| General methods                                                                                                                                                                                | S4  |
| <sup>1</sup> H NMR (CDCl <sub>3</sub> ) spectrum of Ethyl ( <i>E</i> )-4,7-dioxohept-5-enoate ( <b>8</b> )                                                                                     | S5  |
| <sup>13</sup> C NMR (CDCl <sub>3</sub> ) spectrum of Ethyl ( <i>E</i> )-4,7-dioxohept-5-enoate ( <b>8</b> )                                                                                    | S5  |
| <sup>1</sup> H NMR (CDCl <sub>3</sub> ) spectrum of Ethyl ( <i>E</i> )-7,7-dimethoxy-4-oxohept-5-enoate ( <b>9</b> )                                                                           | S6  |
| <sup>13</sup> C NMR (CDCl <sub>3</sub> ) spectrum of Ethyl ( <i>E</i> )-7,7-dimethoxy-4-oxohept-5-enoate ( <b>9</b> )                                                                          | S6  |
| <sup>1</sup> H NMR (CDCl <sub>3</sub> ) spectrum of Ethyl ( <i>E</i> )-4-hydroxy-7,7-dimethoxyhept-5-enoate ( <b>10</b> )                                                                      | S7  |
| <sup>1</sup> H NMR (CDCl <sub>3</sub> ) spectrum of Ethyl ( <i>E</i> )-4-hydroxy-7,7-dimethoxyhept-5-enoate ( <b>11</b> )                                                                      | S7  |
| gCOSY NMR (CDCl <sub>3</sub> ) spectrum of Ethyl ( <i>E</i> )-4-hydroxy-7,7-dimethoxyhept-5-enoate ( <b>11</b> )                                                                               | S8  |
| <sup>1</sup> H NMR (CDCl <sub>3</sub> ) spectrum of ( <i>E</i> )-3-(5-oxotetrahydrofuran-2-yl)acrylaldehyde ( <b>12</b> )                                                                      | S8  |
| <sup>1</sup> H NMR (CDCl <sub>3</sub> ) spectrum of ( <i>E</i> )-7,7-dimethoxy-4-oxohept-5-enoic acid ( <b>3a</b> )                                                                            | S9  |
| <sup>13</sup> C NMR (CDCl <sub>3</sub> ) spectrum of ( <i>E</i> )-7,7-dimethoxy-4-oxohept-5-enoic acid ( <b>3a</b> )                                                                           | S9  |
| <sup>1</sup> H NMR (CD <sub>3</sub> OD+CDCl <sub>3</sub> ) spectrum of ( <i>E</i> )-(7,7-dimethoxy-4-oxohept-5-enoyl)-1-palmitoyl- <i>sn</i> -glycero-3-phosphatidylcholine ( <b>18a</b> )     | S10 |
| <sup>13</sup> C NMR (CD <sub>3</sub> OD+CDCl <sub>3</sub> ) spectrum of ( <i>E</i> )-(7,7-dimethoxy-4-oxohept-5-enoyl)-1-palmitoyl- <i>sn</i> -glycero-3-phosphatidylcholine ( <b>18a</b> )    | S10 |
| <sup>1</sup> H NMR (CD <sub>3</sub> OD+CDCl <sub>3</sub> ) spectrum of ( <i>E</i> )-(4-hydroxy-7,7-dimethoxyhept-5-enoyl)-1-palmitoyl- <i>sn</i> -glycero-3-phosphatidylcholine ( <b>2a</b> )  | S11 |
| <sup>13</sup> C NMR (CD <sub>3</sub> OD+CDCl <sub>3</sub> ) spectrum of ( <i>E</i> )-(4-hydroxy-7,7-dimethoxyhept-5-enoyl)-1-palmitoyl- <i>sn</i> -glycero-3-phosphatidylcholine ( <b>2a</b> ) | S11 |
| <sup>1</sup> H NMR (CD <sub>3</sub> OD+CDCl <sub>3</sub> ) spectrum of ( <i>E</i> )-(4-hydroxy-7-oxohept-5-enoyl)-1-palmitoyl- <i>sn</i> -glycero-3-phosphatidylcholine ( <b>HOHA-PC, 1a</b> ) | S12 |
| <sup>1</sup> H NMR (CDCl <sub>3</sub> ) spectrum of 1-tributylstannyl-3,3-diethoxy-prop-1-ene ( <b>4</b> )                                                                                     | S12 |
| <sup>1</sup> H NMR (CDCl <sub>3</sub> ) spectrum of Methyl ( <i>E</i> )-8,8-diethoxy-5-oxooct-6-enoate ( <b>14b</b> )                                                                          | S13 |
| <sup>13</sup> C NMR (CDCl <sub>3</sub> ) spectrum of Methyl ( <i>E</i> )-8,8-diethoxy-5-oxooct-6-enoate ( <b>14b</b> )                                                                         | S13 |
| <sup>1</sup> H NMR (CDCl <sub>3</sub> ) spectrum of Methyl ( <i>E</i> )-8,8-diethoxy-5-hydroxyoct-6-enoate ( <b>15b</b> )                                                                      | S14 |
| gCOSY (CDCl <sub>3</sub> ) spectrum of Methyl ( <i>E</i> )-8,8-diethoxy-5-hydroxyoct-6-enoate ( <b>15b</b> )                                                                                   | S14 |
| <sup>1</sup> H NMR (CDCl <sub>3</sub> ) spectrum of Methyl ( <i>E</i> )-5-hydroxy-8-oxooct-6-enoate ( <b>16</b> )                                                                              | S15 |

|                                                                                                                                                                                                 |     |
|-------------------------------------------------------------------------------------------------------------------------------------------------------------------------------------------------|-----|
| gCOSY NMR (CDCl <sub>3</sub> ) spectrum of Methyl ( <i>E</i> )-5-hydroxy-8-oxooct-6-enoate ( <b>16</b> )                                                                                        | S15 |
| <sup>1</sup> H NMR (CDCl <sub>3</sub> ) spectrum of ( <i>E</i> )-3-(6-oxotetrahydro-2H-pyran-2-yl)acrylaldehyde ( <b>17</b> )                                                                   | S16 |
| <sup>1</sup> H NMR (CDCl <sub>3</sub> ) spectrum of ( <i>E</i> )-8,8-diethoxy-5-oxooct-6-enoic acid ( <b>3b</b> )                                                                               | S16 |
| <sup>13</sup> C NMR (CDCl <sub>3</sub> ) spectrum of ( <i>E</i> )-8,8-diethoxy-5-oxooct-6-enoic acid ( <b>3b</b> )                                                                              | S17 |
| <sup>1</sup> H NMR (CD <sub>3</sub> OD+CDCl <sub>3</sub> ) spectrum of ( <i>E</i> )-(8,8-diethoxy-5-oxooct-6-enoyl)-1-palmitoyl- <i>sn</i> -glycero-3-phosphatidylcholine ( <b>18b</b> )        | S17 |
| <sup>13</sup> C NMR (CD <sub>3</sub> OD+CDCl <sub>3</sub> ) spectrum of ( <i>E</i> )-(8,8-diethoxy-5-oxooct-6-enoyl)-1-palmitoyl- <i>sn</i> -glycero-3-phosphatidylcholine ( <b>18b</b> )       | S18 |
| <sup>1</sup> H NMR (CD <sub>3</sub> OD+CDCl <sub>3</sub> ) spectrum of ( <i>E</i> )-(5-hydroxy-8,8-diethoxyoct-6-enoyl)-1-palmitoyl- <i>sn</i> -glycero-3-phosphatidylcholine ( <b>2b</b> )     | S18 |
| <sup>13</sup> C NMR (CD <sub>3</sub> OD+CDCl <sub>3</sub> ) spectrum of ( <i>E</i> )-(5-hydroxy-8,8-diethoxyoct-6-enoyl)-1-palmitoyl- <i>sn</i> -glycero-3-phosphatidylcholine ( <b>2b</b> )    | S19 |
| <sup>1</sup> H NMR (CD <sub>3</sub> OD+CDCl <sub>3</sub> ) spectrum of ( <i>E</i> )-(5-hydroxy-8-oxooct-6-enoyl)-1-palmitoyl- <i>sn</i> -glycero-3-phosphatidylcholine ( <b>HOOA-PC, 1b</b> )   | S19 |
| <sup>1</sup> H NMR (CD <sub>3</sub> OD+CDCl <sub>3</sub> ) spectrum of Methyl-9-(chlorocarbonyl)octanoate ( <b>7b</b> )                                                                         | S20 |
| IR spectrum of Methyl-9-(chlorocarbonyl)octanoate ( <b>5c</b> )                                                                                                                                 | S20 |
| <sup>1</sup> H NMR (CDCl <sub>3</sub> ) spectrum of Methyl ( <i>E</i> )-12,12-diethoxy-9-oxodec-10-enoate ( <b>14c</b> )                                                                        | S21 |
| <sup>13</sup> C NMR (CDCl <sub>3</sub> ) spectrum of Methyl ( <i>E</i> )-12,12-diethoxy-9-oxodec-10-enoate ( <b>14c</b> )                                                                       | S21 |
| <sup>1</sup> H NMR (CDCl <sub>3</sub> ) spectrum of ( <i>E</i> )-12,12-diethoxy-9-oxodec-10-enoic acid ( <b>3c</b> )                                                                            | S22 |
| <sup>13</sup> C NMR (CDCl <sub>3</sub> ) spectrum of ( <i>E</i> )-12,12-diethoxy-9-oxodec-10-enoic acid ( <b>3c</b> )                                                                           | S22 |
| <sup>1</sup> H NMR (CD <sub>3</sub> OD+CDCl <sub>3</sub> ) spectrum of ( <i>E</i> )-(12,12-diethoxy-9-oxodec-10-enoyl)-1-palmitoyl- <i>sn</i> -glycero-3-phosphatidylcholine ( <b>18c</b> )     | S23 |
| <sup>13</sup> C NMR (CD <sub>3</sub> OD+CDCl <sub>3</sub> ) spectrum of ( <i>E</i> )-(12,12-diethoxy-9-oxodec-10-enoyl)-1-palmitoyl- <i>sn</i> -glycero-3-phosphatidylcholine ( <b>18c</b> )    | S23 |
| <sup>1</sup> H NMR (CD <sub>3</sub> OD+CDCl <sub>3</sub> ) spectrum of ( <i>E</i> )-(9-hydroxy-12,12-diethoxydec-10-enoyl)-1-palmitoyl- <i>sn</i> -glycero-3-phosphatidylcholine ( <b>2c</b> )  | S24 |
| <sup>1</sup> H NMR (CD <sub>3</sub> OD+CDCl <sub>3</sub> ) spectrum of ( <i>E</i> )-(9-hydroxy-12,12-diethoxydec-10-enoyl)-1-palmitoyl- <i>sn</i> -glycero-3-phosphatidylcholine ( <b>2c</b> )  | S24 |
| <sup>1</sup> H NMR (CD <sub>3</sub> OD+CDCl <sub>3</sub> ) spectrum of ( <i>E</i> )-(9-hydroxy-12-oxodec-10-enoyl)-1-palmitoyl- <i>sn</i> -glycero-3-phosphatidylcholine ( <b>HODA-PC, 1c</b> ) | S25 |

## General methods.

Proton magnetic resonance ( $^1\text{H}$  NMR) spectra and carbon magnetic resonance ( $^{13}\text{C}$  NMR) spectra were recorded on a Varian Inova AS400 spectrometer operating 400 MHz or 75 MHz. Proton chemical shifts are reported in parts per million (ppm) on  $\delta$  scale relative to  $\text{CDCl}_3$  ( $\delta$  7.26) or  $\text{CD}_3\text{OD}$  ( $\delta$  3.31).  $^1\text{H}$  NMR spectral data are tabulated in terms of multiplicity of proton absorption (s, singlet; d, doublet; t, triplet; q, quartet; m, multiplet; br, broad), coupling constants (Hz), number of protons. gCOSY experiment was done on a spectrometer at 400 MHz. All high resolution mass spectra were recorded on a Kratos AEI MS25 RFA high resolution mass spectrometer at 20 eV. FT-IR was obtained as KBr pellets using an MIDAC Co. M2000. All solvents were distilled under a nitrogen atmosphere prior to use, and all materials were obtained from Aldrich unless specified. Flash chromatography was performed with ACS grade solvent.  $R_f$  values are quoted for TLC plates of thickness 0.25 mm. The plates were visualized with iodine, dinitrophenylhydrazine or phosphomolybdic acid reagents. Flash column chromatograph was performed on 230-400 mesh silica gels supplied by Whatman and Sorbent.

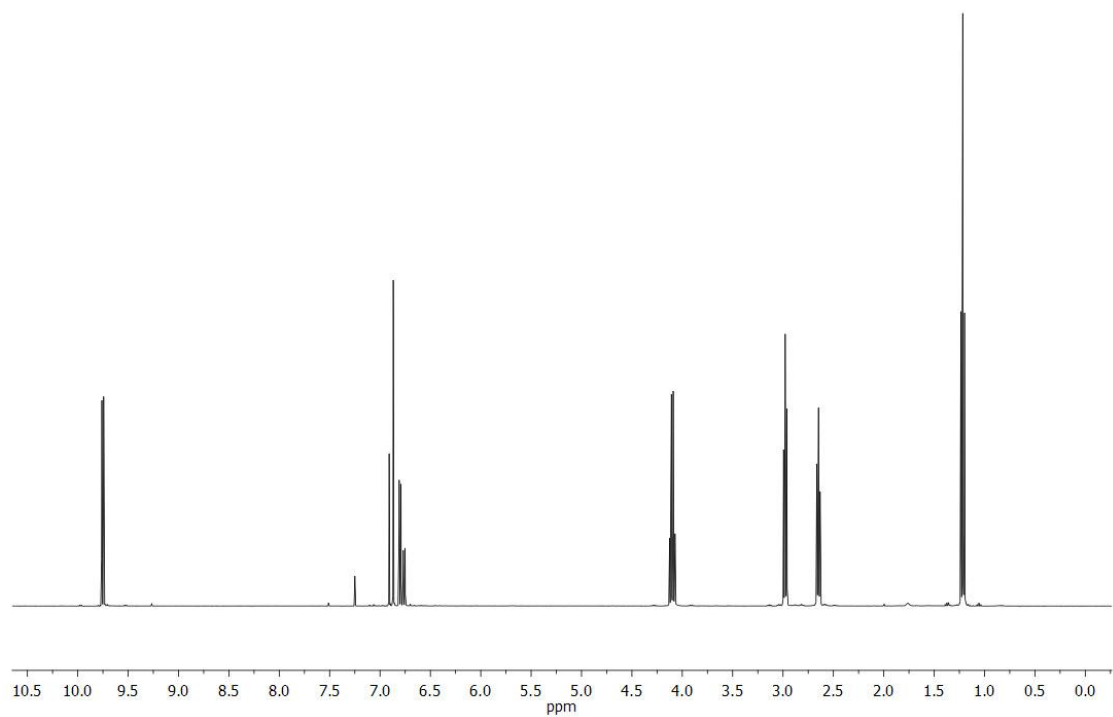

**Figure S1** The 400MHz <sup>1</sup>H NMR (CDCl<sub>3</sub>) spectrum of Ethyl (*E*)-4,7-dioxohept-5-enoate (**8**)

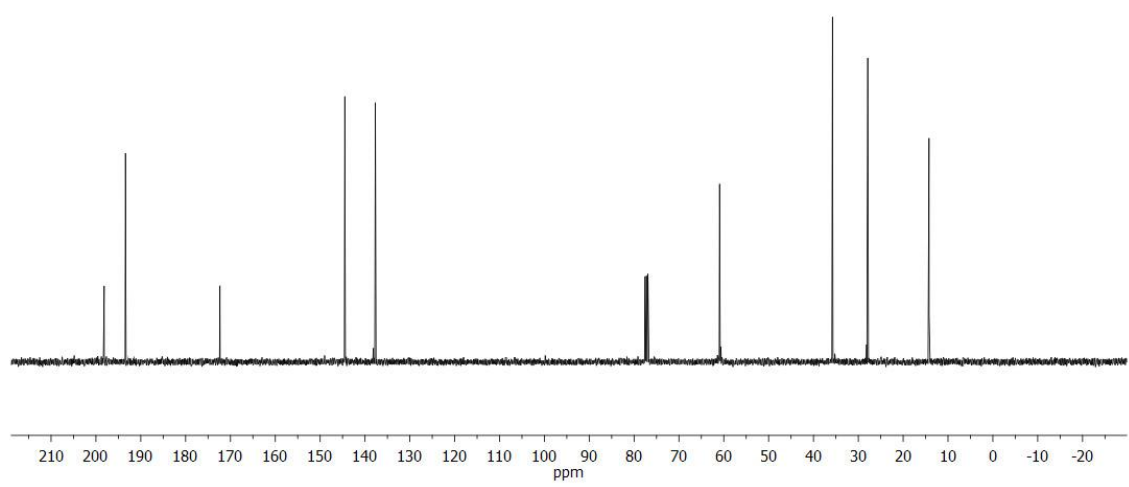

**Figure S2** The 100MHz <sup>13</sup>C NMR (CDCl<sub>3</sub>) spectrum of Ethyl (*E*)-4,7-dioxohept-5-enoate (**8**)

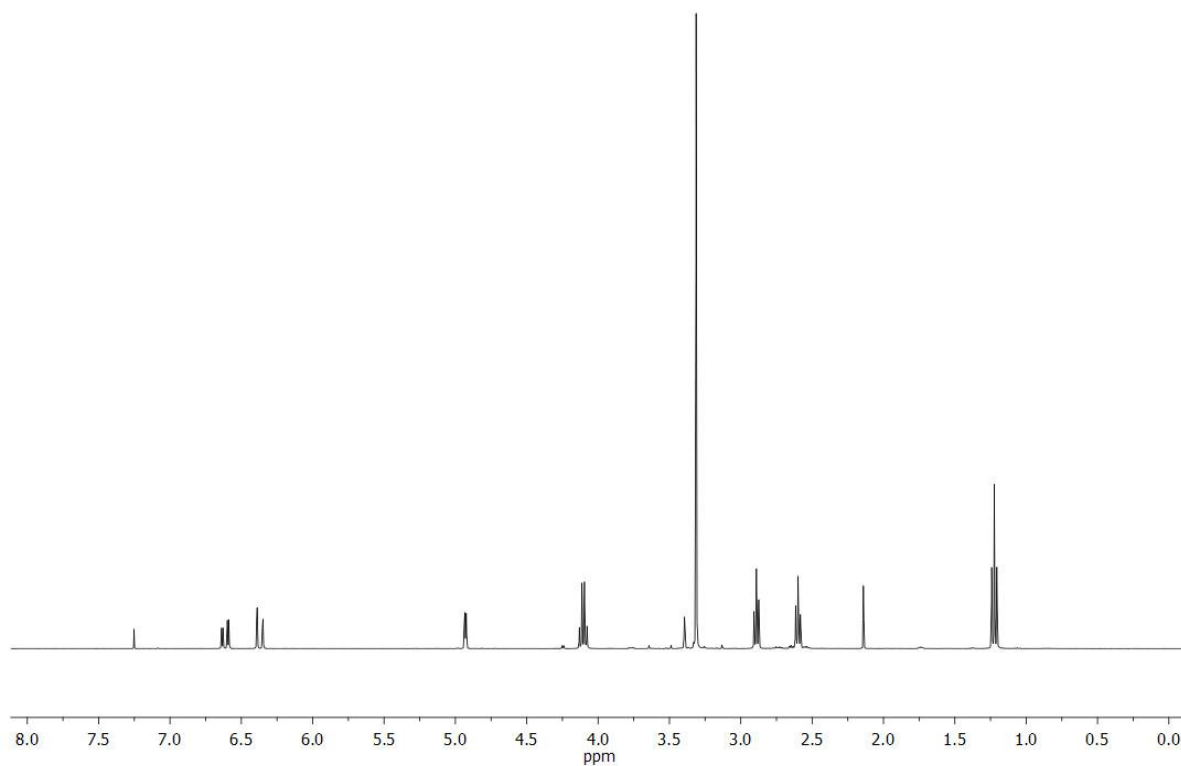

**Figure S3** The 400MHz <sup>1</sup>H NMR (CDCl<sub>3</sub>) spectrum of Ethyl (*E*)-7,7-dimethoxy-4-oxohept-5-enoate (**9**)

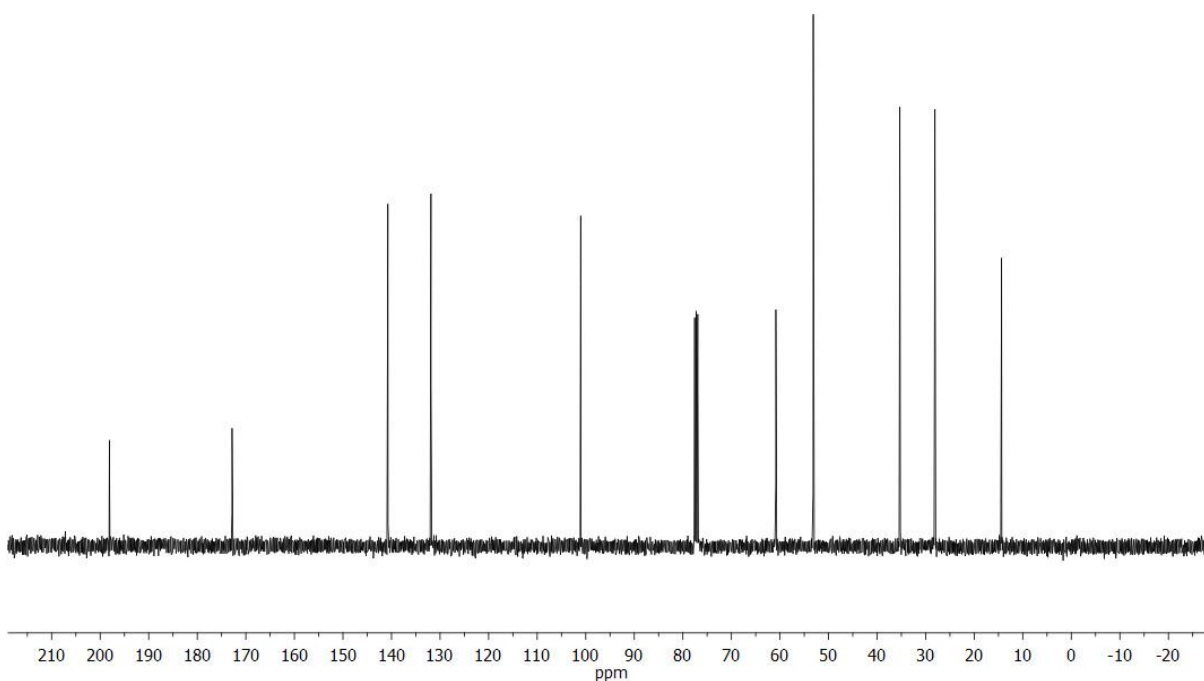

**Figure S4** The 100MHz <sup>13</sup>C NMR (CDCl<sub>3</sub>) spectrum of Ethyl (*E*)-7,7-dimethoxy-4-oxohept-5-enoate (**9**)

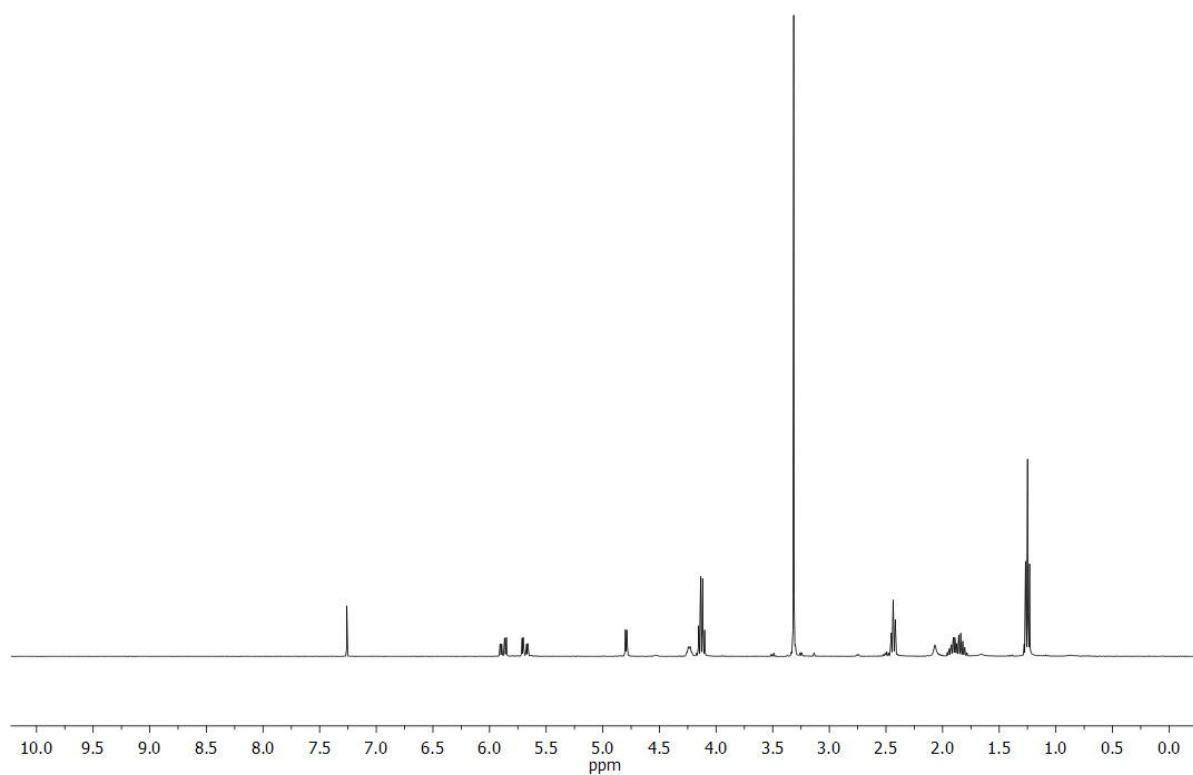

**Figure S5** The 400MHz <sup>1</sup>H NMR (CDCl<sub>3</sub>) spectrum of Ethyl (*E*)-4-hydroxy-7,7-dimethoxyhept-5-enoate (**10**)

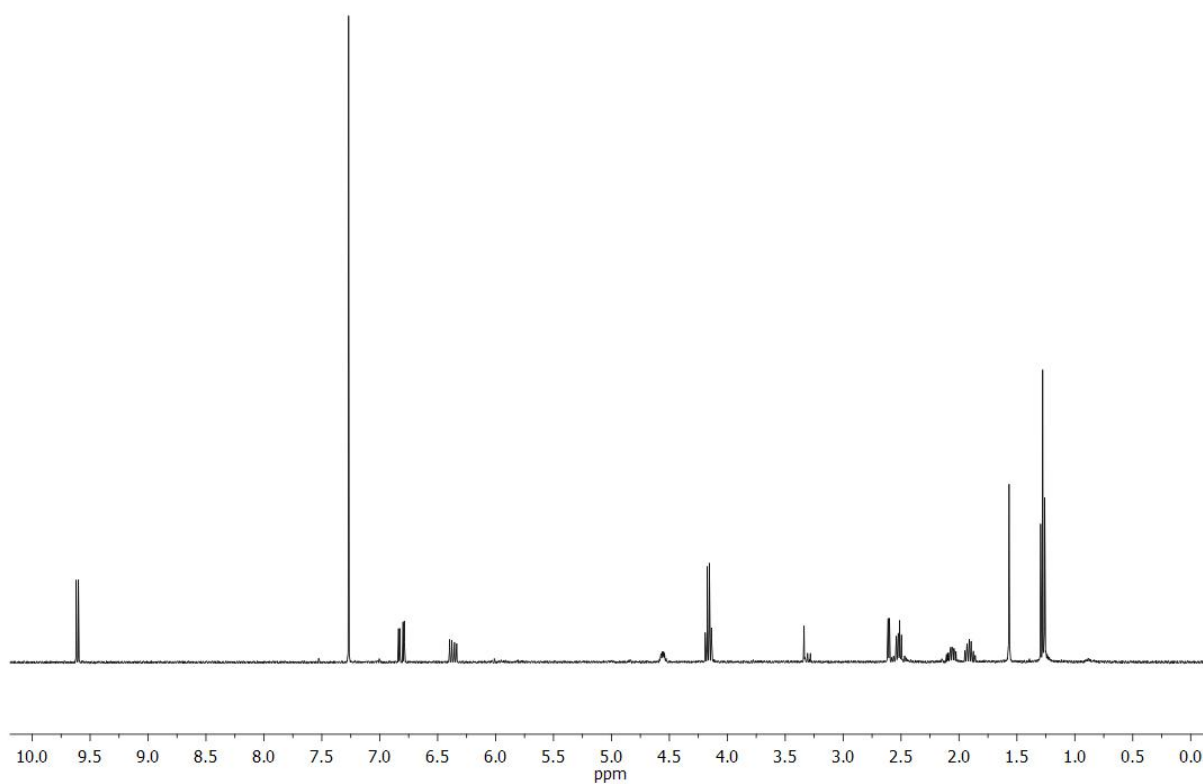

**Figure S6** The 400MHz <sup>1</sup>H NMR (CDCl<sub>3</sub>) spectrum of Ethyl (*E*)-4-hydroxy-7,7-dimethoxyhept-5-enoate (**11**)

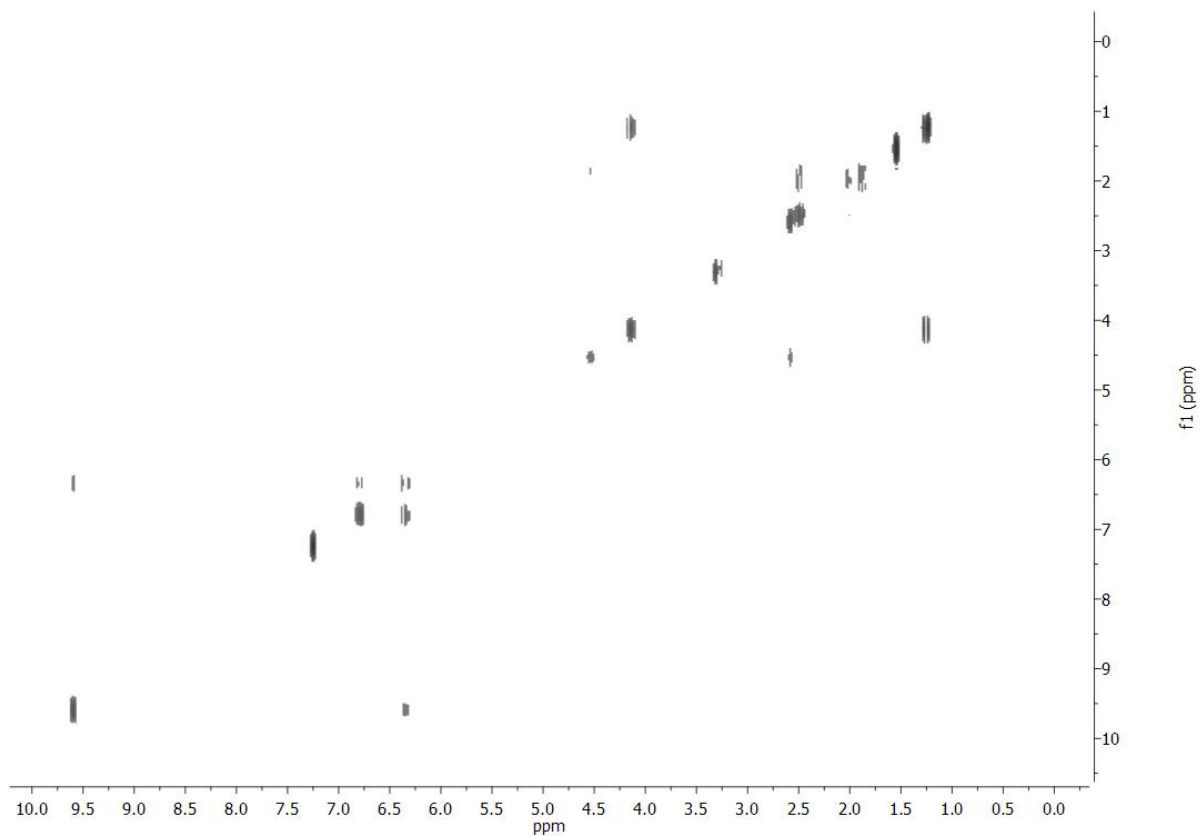

**Figure S7** The 400MHz gCOSY NMR (CDCl<sub>3</sub>) spectrum of Ethyl (*E*)-4-hydroxy-7,7-dimethoxyhept-5-enoate (**11**)

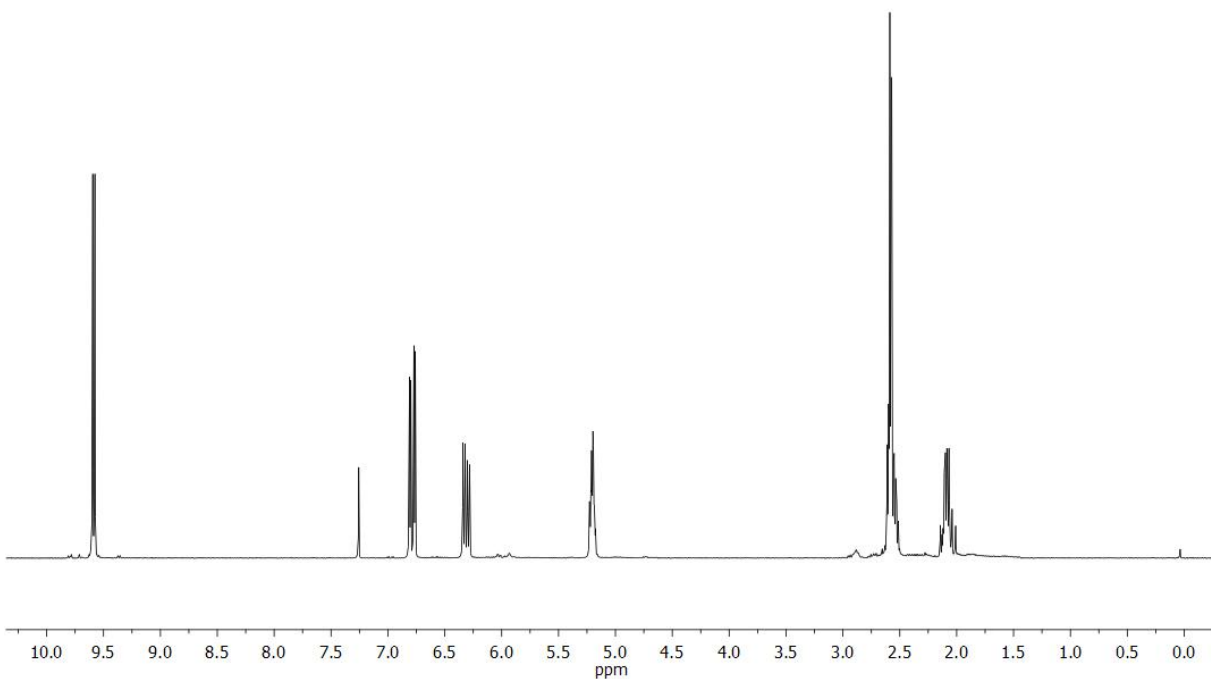

**Figure S8** The 400MHz <sup>1</sup>H NMR (CDCl<sub>3</sub>) spectrum of (*E*)-3-(5-oxotetrahydrofuran-2-yl)acrylaldehyde (**12**)



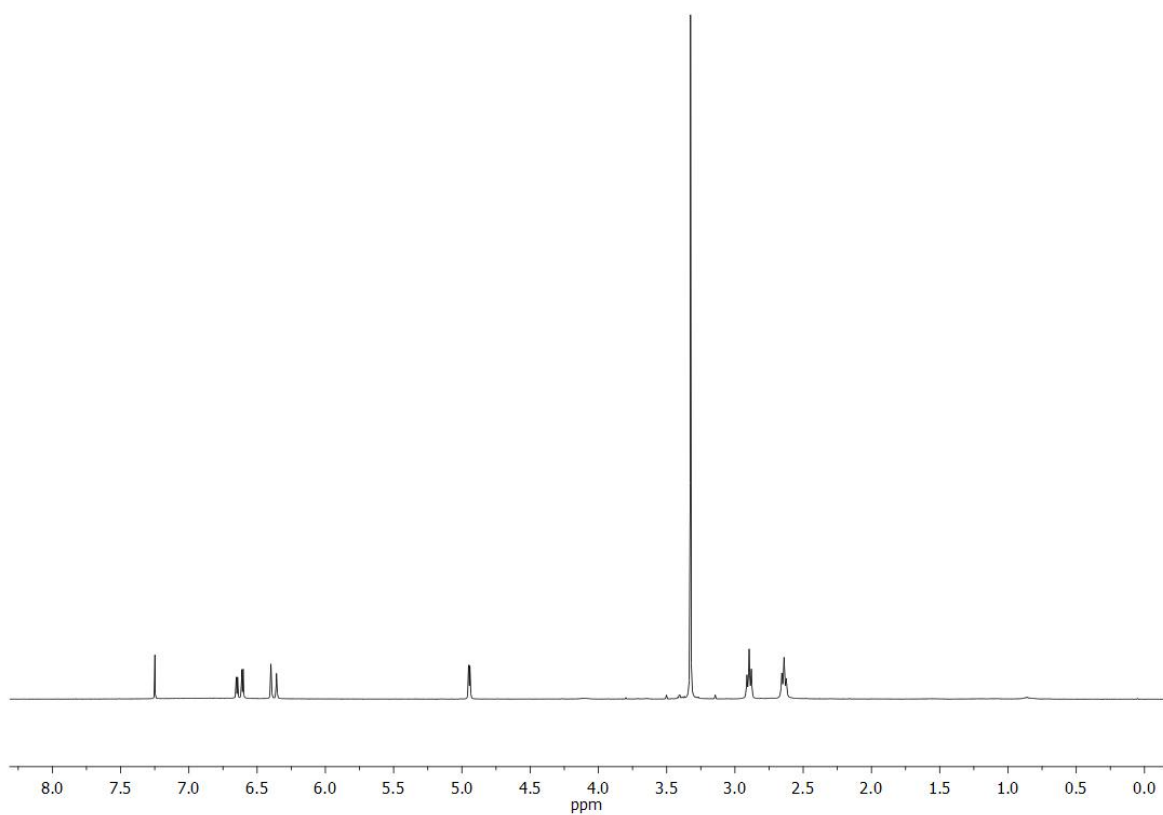

**Figure S9** The 400MHz <sup>1</sup>H NMR (CDCl<sub>3</sub>) spectrum of (*E*)-7,7-dimethoxy-4-oxohept-5-enoic acid (**3a**)

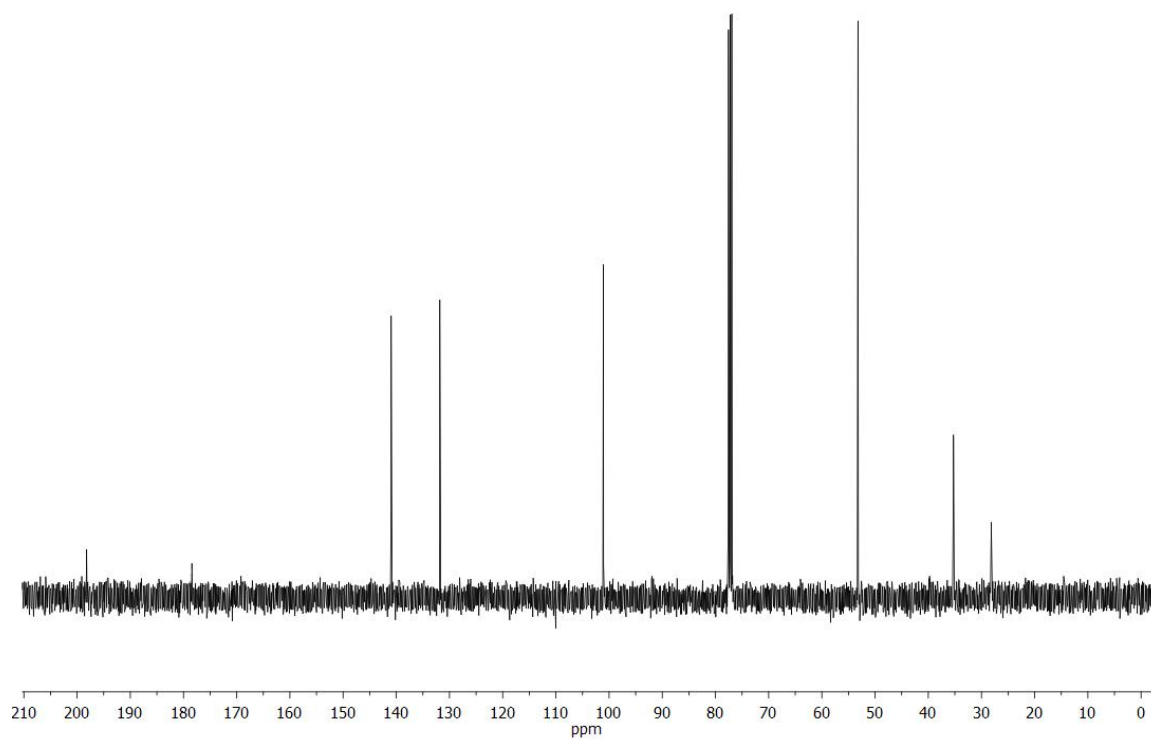

**Figure S10** The 100MHz <sup>13</sup>C NMR (CDCl<sub>3</sub>) spectrum of (*E*)-7,7-dimethoxy-4-oxohept-5-enoic acid (**3a**)

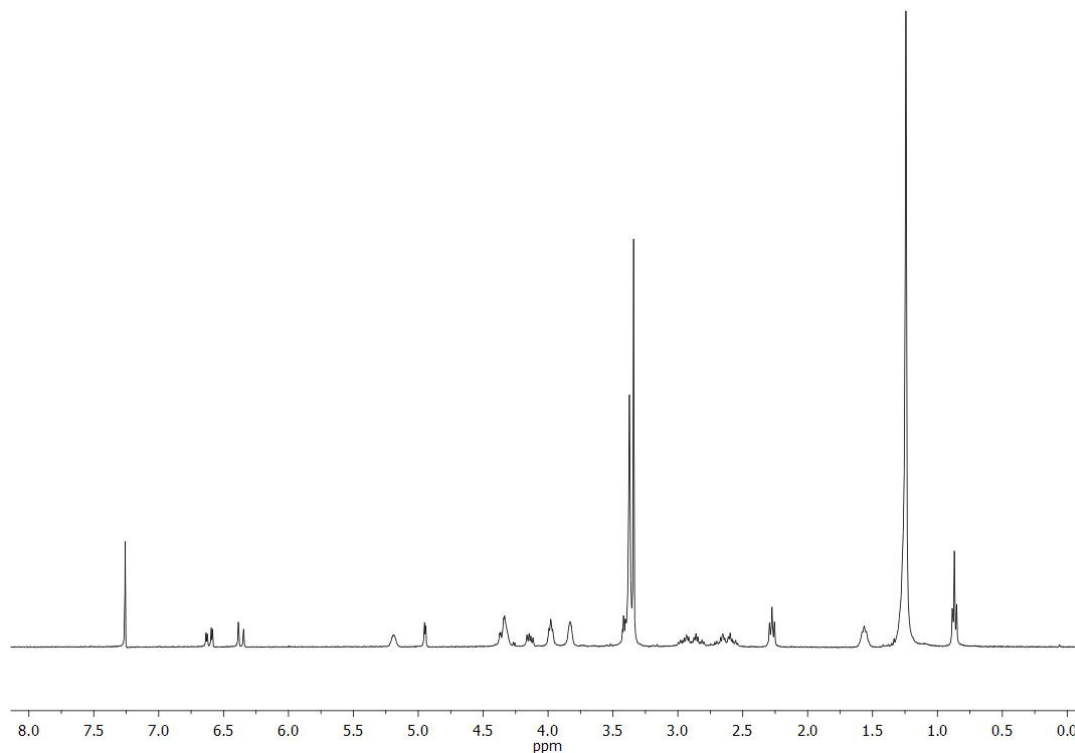

**Figure S11** The 400MHz  $^1\text{H}$  NMR ( $\text{CD}_3\text{OD}+\text{CDCl}_3$ ) spectrum of (*E*)-(7,7-dimethoxy-4-oxohept-5-enoyl)-1-palmitoyl-*sn*-glycero-3-phosphatidylcholine (**18a**)

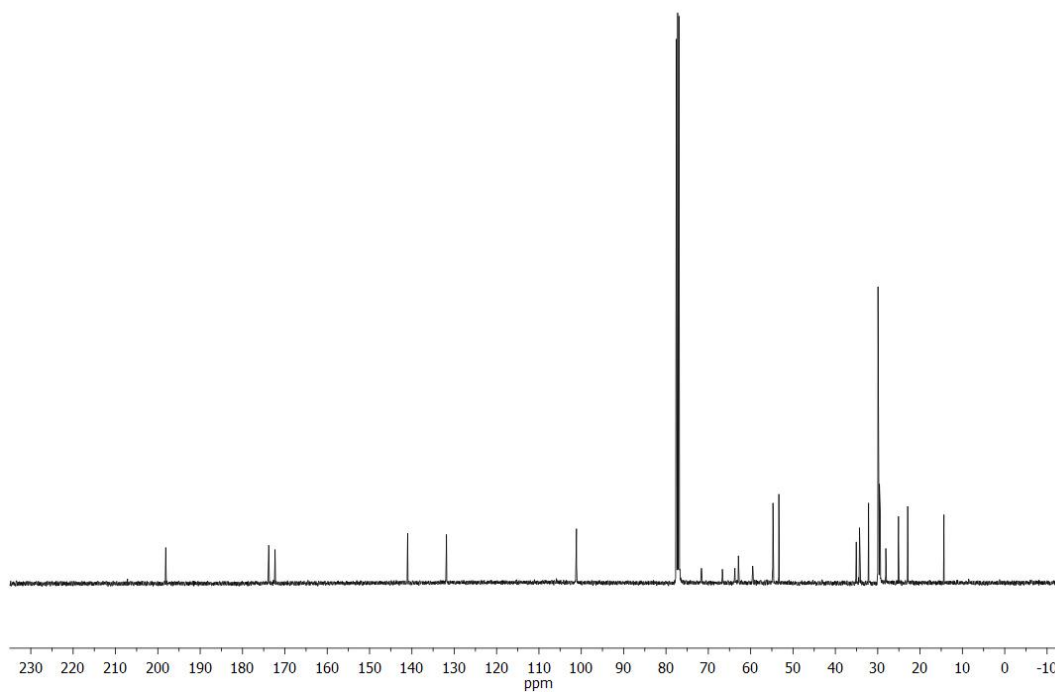

**Figure S12** The 100MHz  $^{13}\text{C}$  NMR ( $\text{CD}_3\text{OD}+\text{CDCl}_3$ ) spectrum of (*E*)-(7,7-dimethoxy-4-oxohept-5-enoyl)-1-palmitoyl-*sn*-glycero-3-phosphatidylcholine (**18a**)

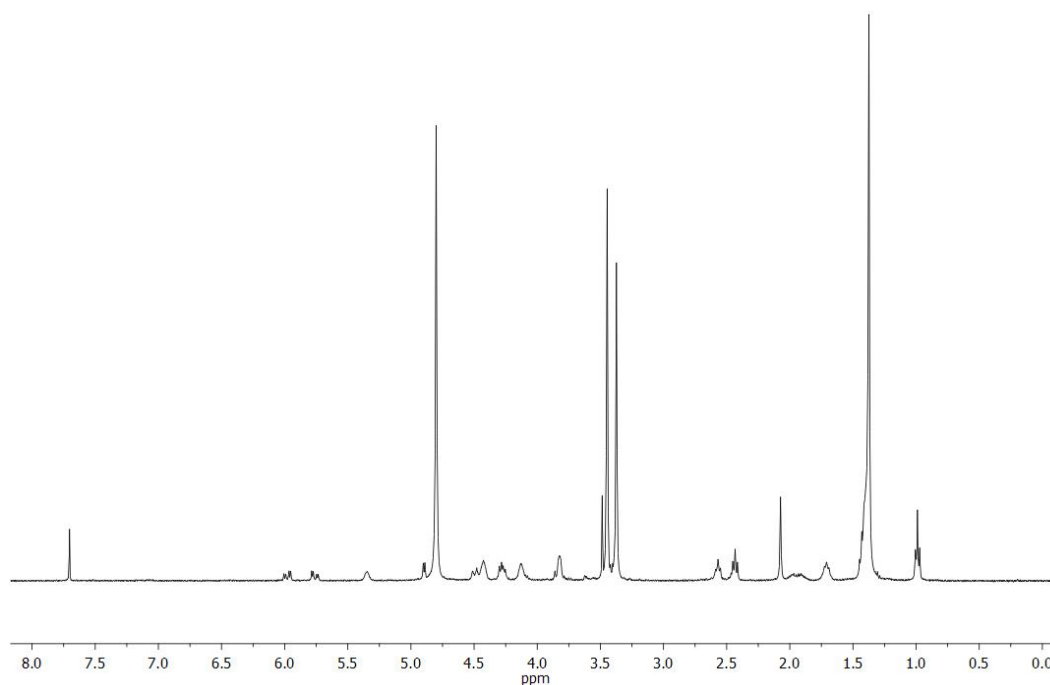

**Figure S13** The 400MHz <sup>1</sup>H NMR (CD<sub>3</sub>OD+CDCl<sub>3</sub>) spectrum of (*E*)-(4-hydroxy-7,7-dimethoxyhept-5-enoyl)-1-palmitoyl-*sn*-glycero-3-phosphatidylcholine (**2a**)

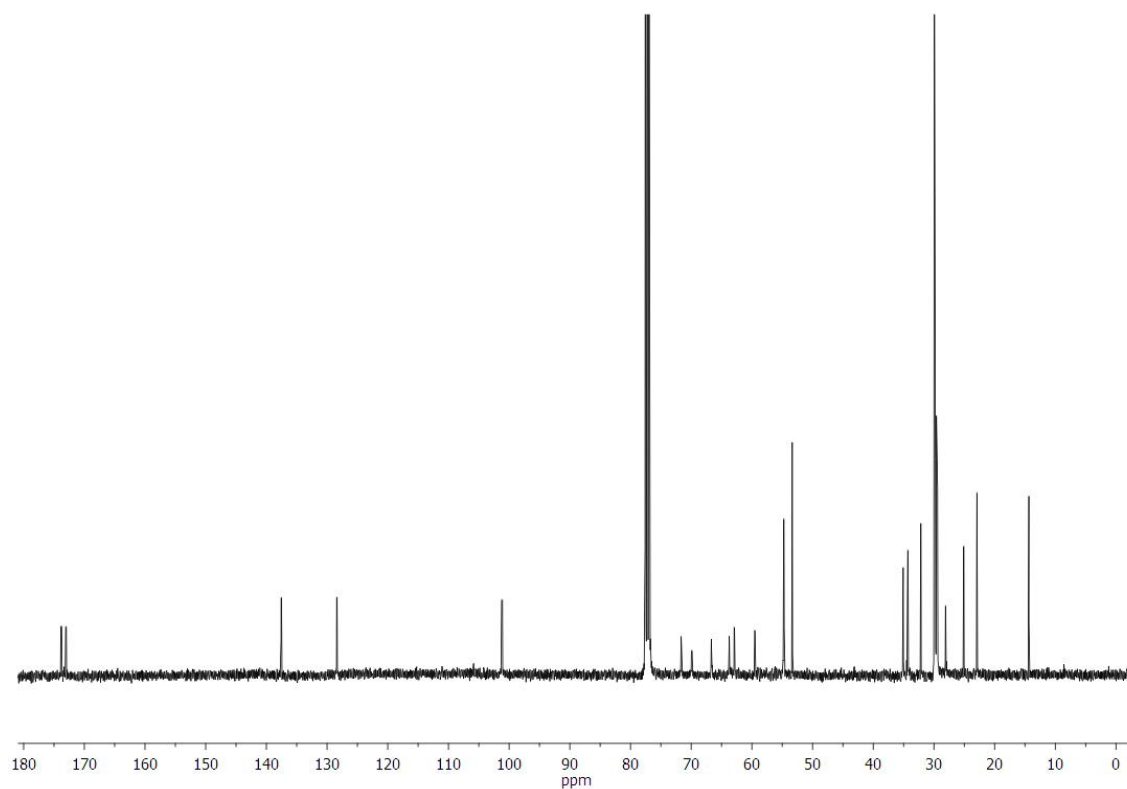

**Figure S14** The 100MHz <sup>13</sup>C NMR (CD<sub>3</sub>OD+CDCl<sub>3</sub>) spectrum of (*E*)-(4-hydroxy-7,7-dimethoxyhept-5-enoyl)-1-palmitoyl-*sn*-glycero-3-phosphatidylcholine (**2a**)

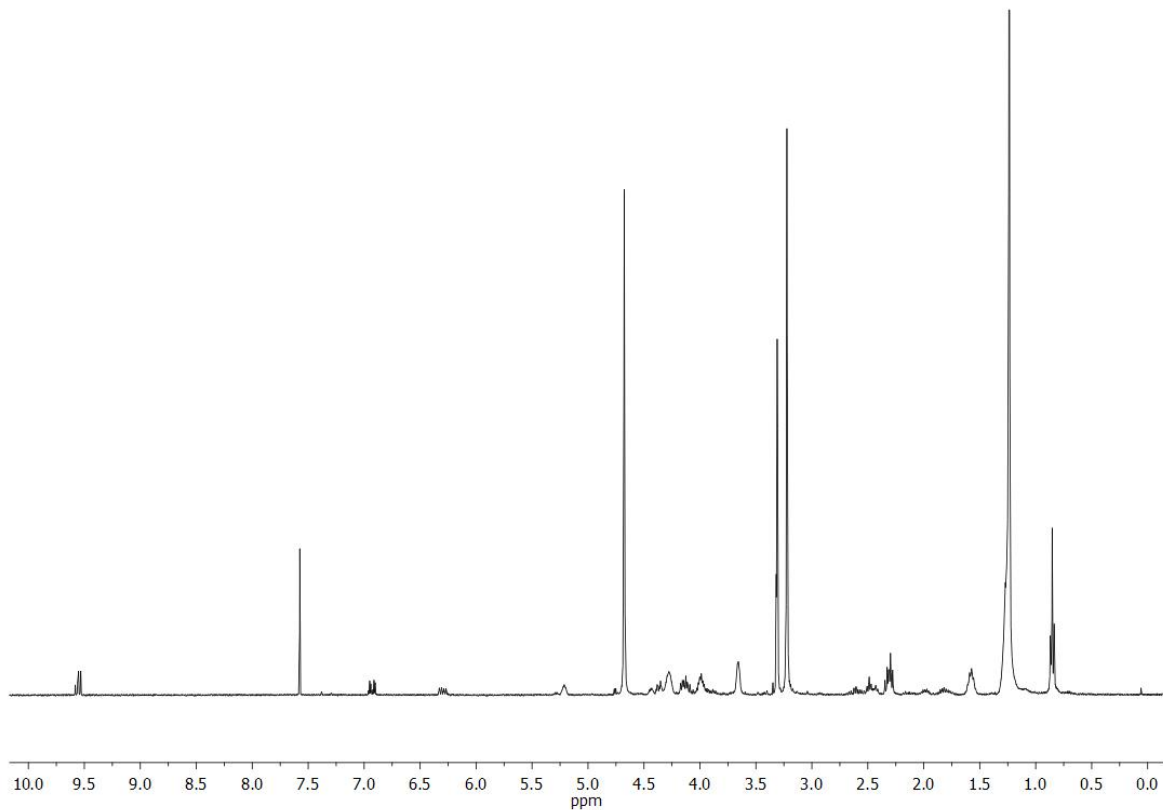

**Figure S15** The 400MHz  $^1\text{H}$  NMR ( $\text{CD}_3\text{OD}+\text{CDCl}_3$ ) spectrum of (*E*)-(4-hydroxy-7-oxohept-5-enoyl)-1-palmitoyl-*sn*-glycero-3-phosphatidylcholine (**HOHA-PC, 1a**)

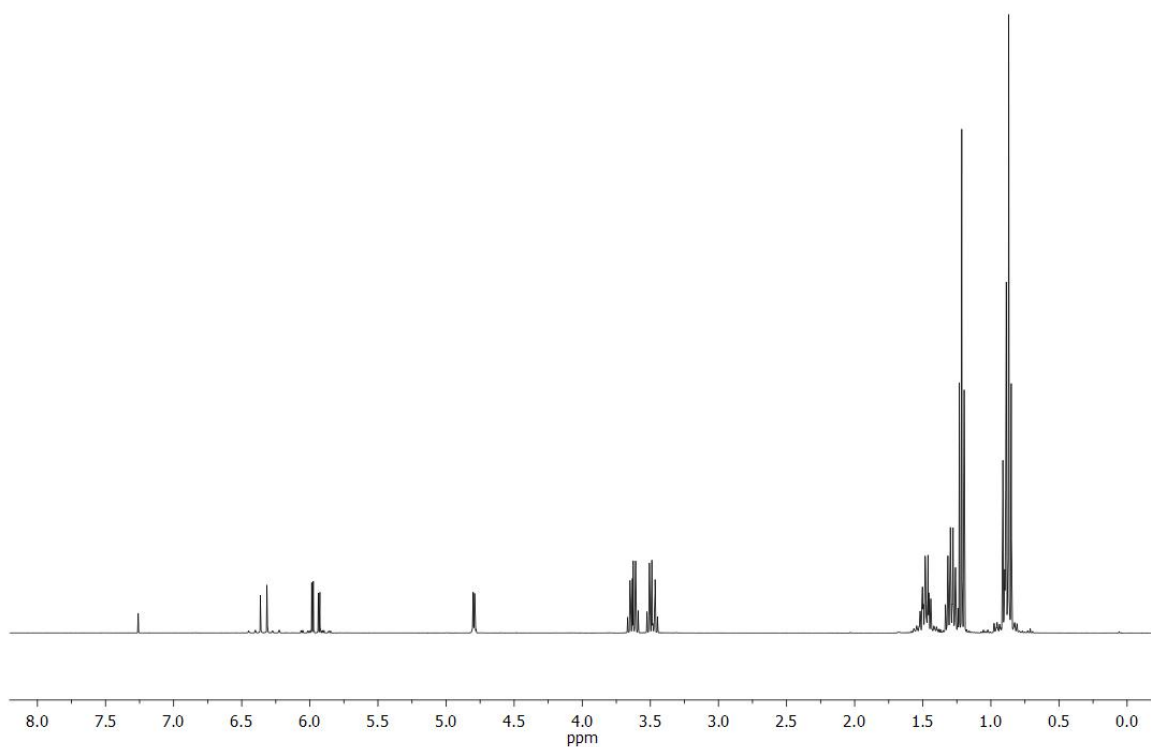

**Figure S16** The 400MHz  $^1\text{H}$  NMR ( $\text{CDCl}_3$ ) spectrum of 1-tributylstannyl-3,3-diethoxy-prop-1-ene (**4**)

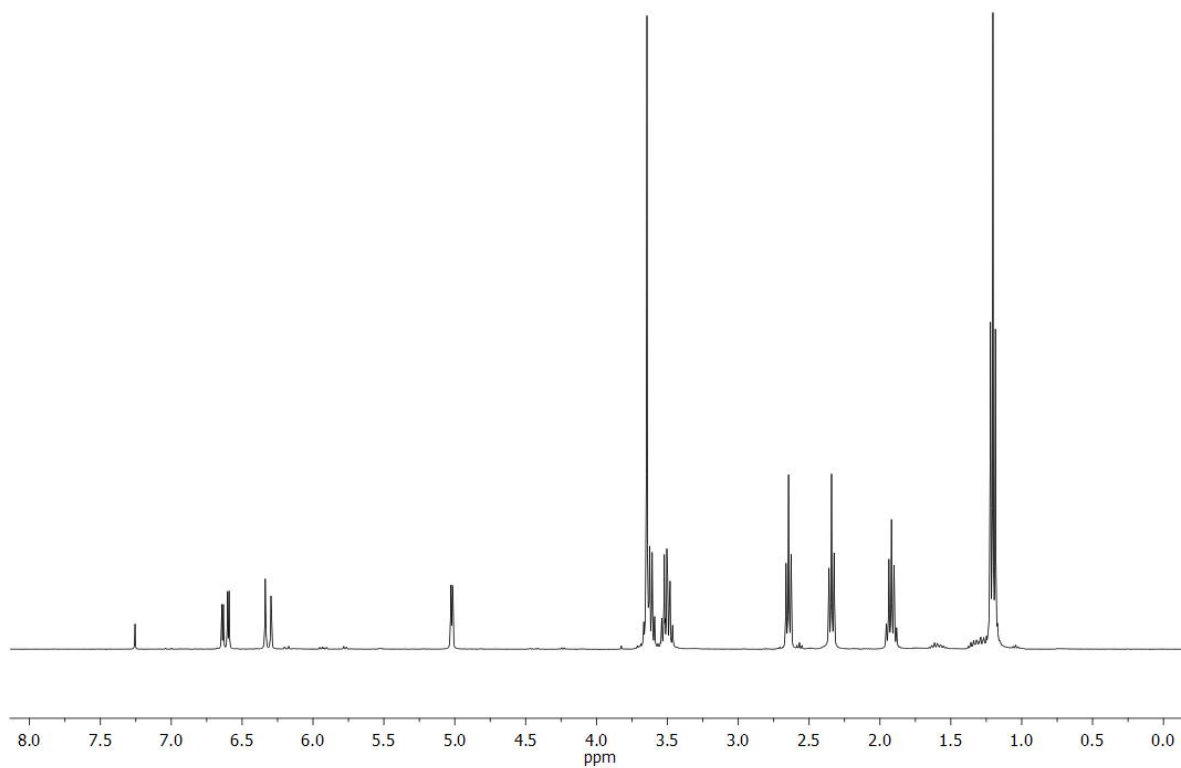

**Figure S17** The 400MHz <sup>1</sup>H NMR (CDCl<sub>3</sub>) spectrum of Methyl (*E*)-8,8-diethoxy-5-oxooct-6-enoate (**14b**)

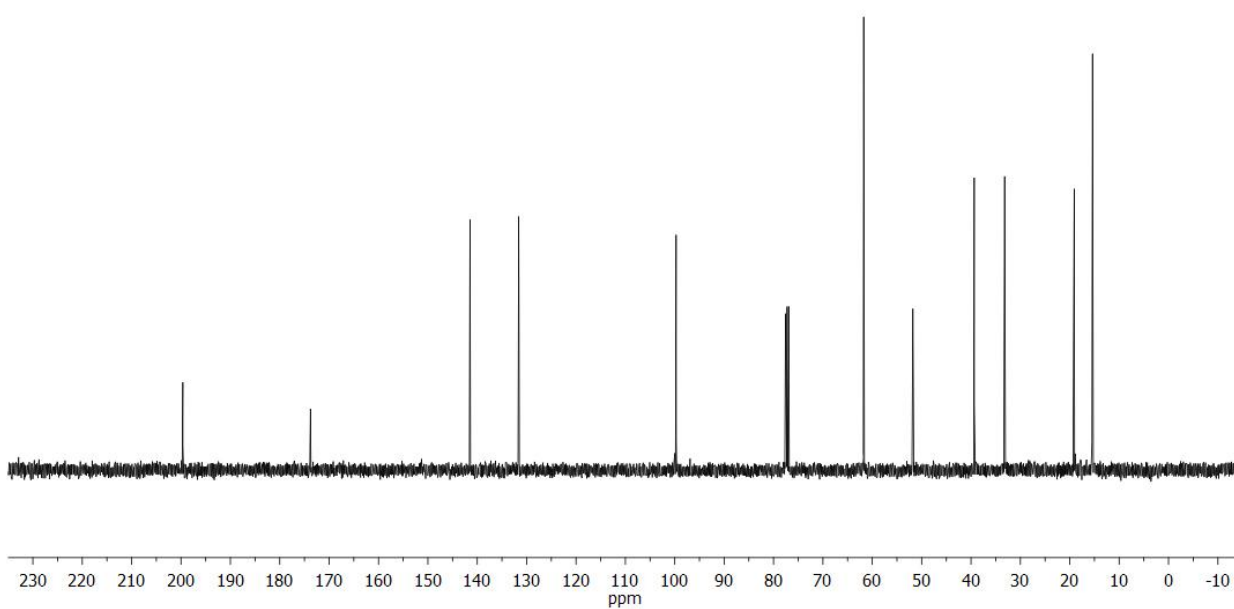

**Figure S18** The 100MHz <sup>13</sup>C NMR (CDCl<sub>3</sub>) spectrum of Methyl (*E*)-8,8-diethoxy-5-oxooct-6-enoate (**14b**)

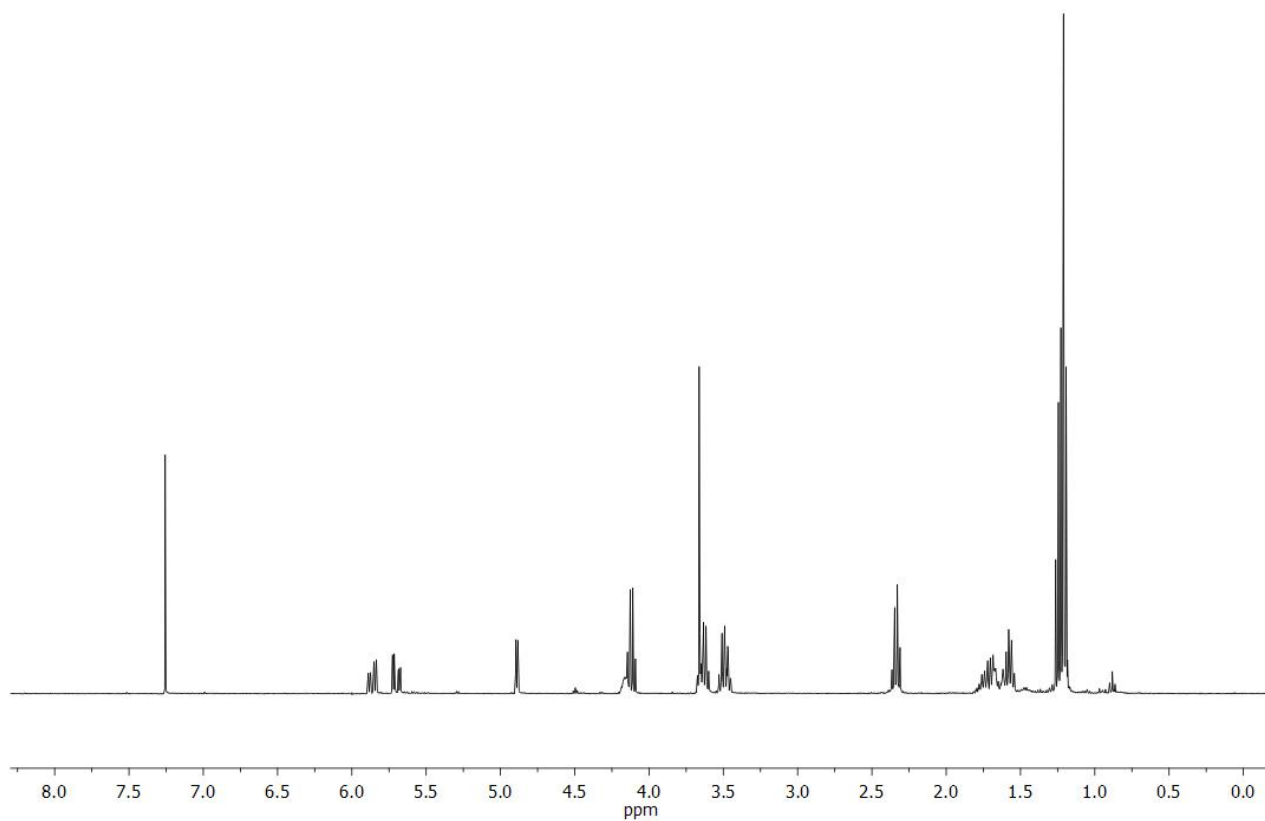

**Figure S19** The 400MHz  $^1\text{H}$  NMR ( $\text{CDCl}_3$ ) spectrum of Methyl (*E*)-8,8-diethoxy-5-hydroxyoct-6-enoate (15b)

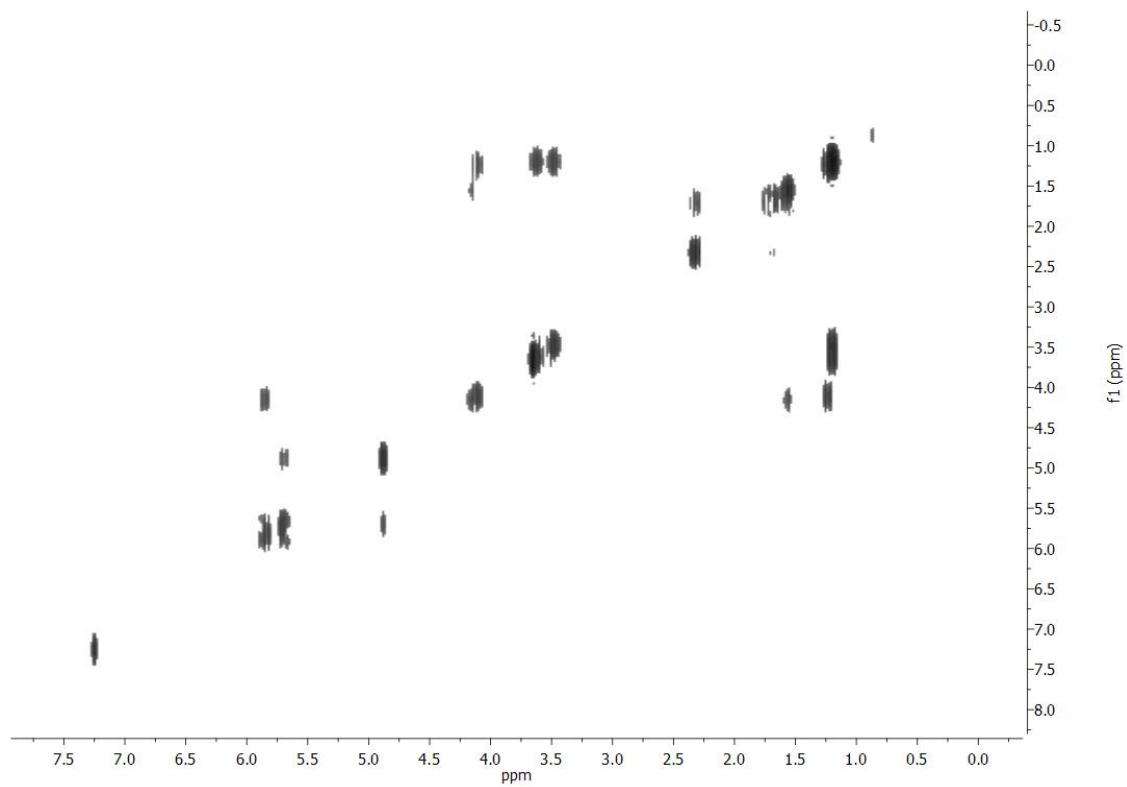

**Figure S20** The 400MHz gCOSY (CDCl<sub>3</sub>) spectrum of Methyl (*E*)-8,8-diethoxy-5-hydroxyoct-6-enoate (**15b**)

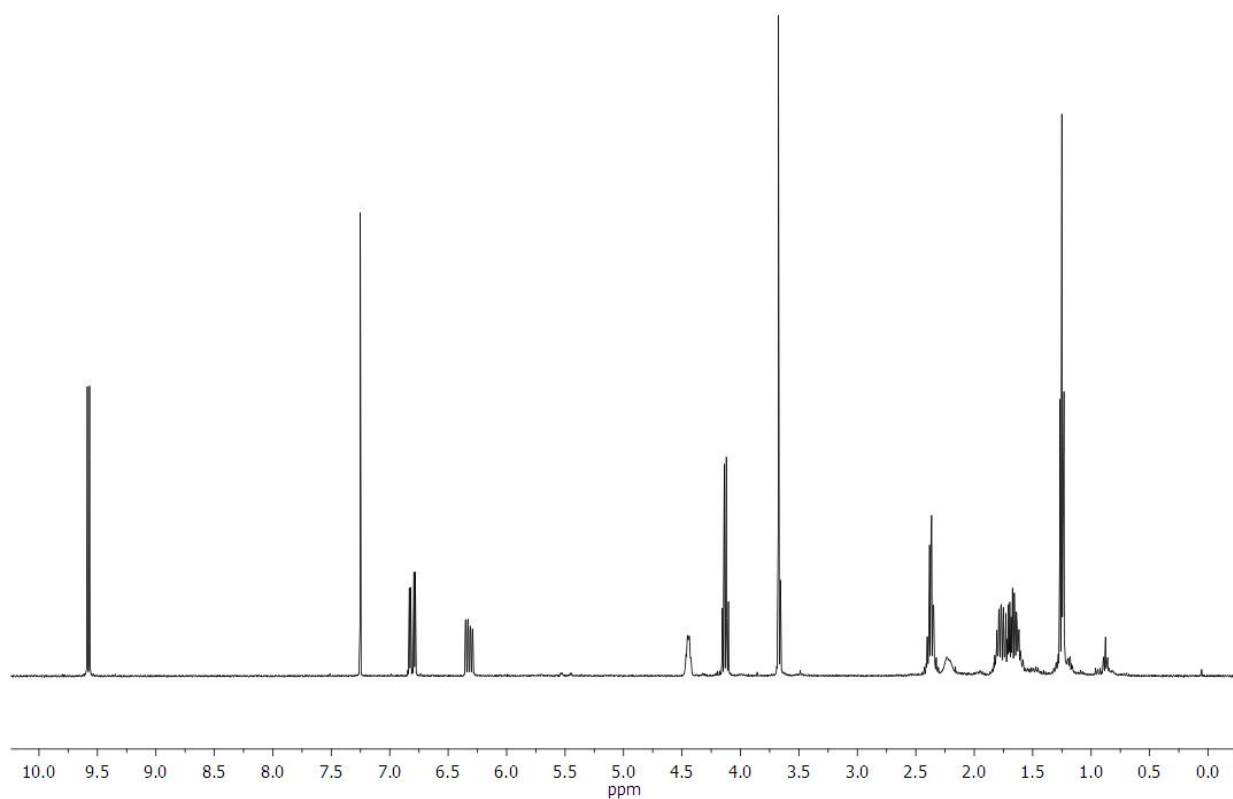

**Figure S21** The 400MHz <sup>1</sup>H NMR (CDCl<sub>3</sub>) spectrum of (*E*)-methyl-5-hydroxy-8-oxooct-6-enoate (**16**)

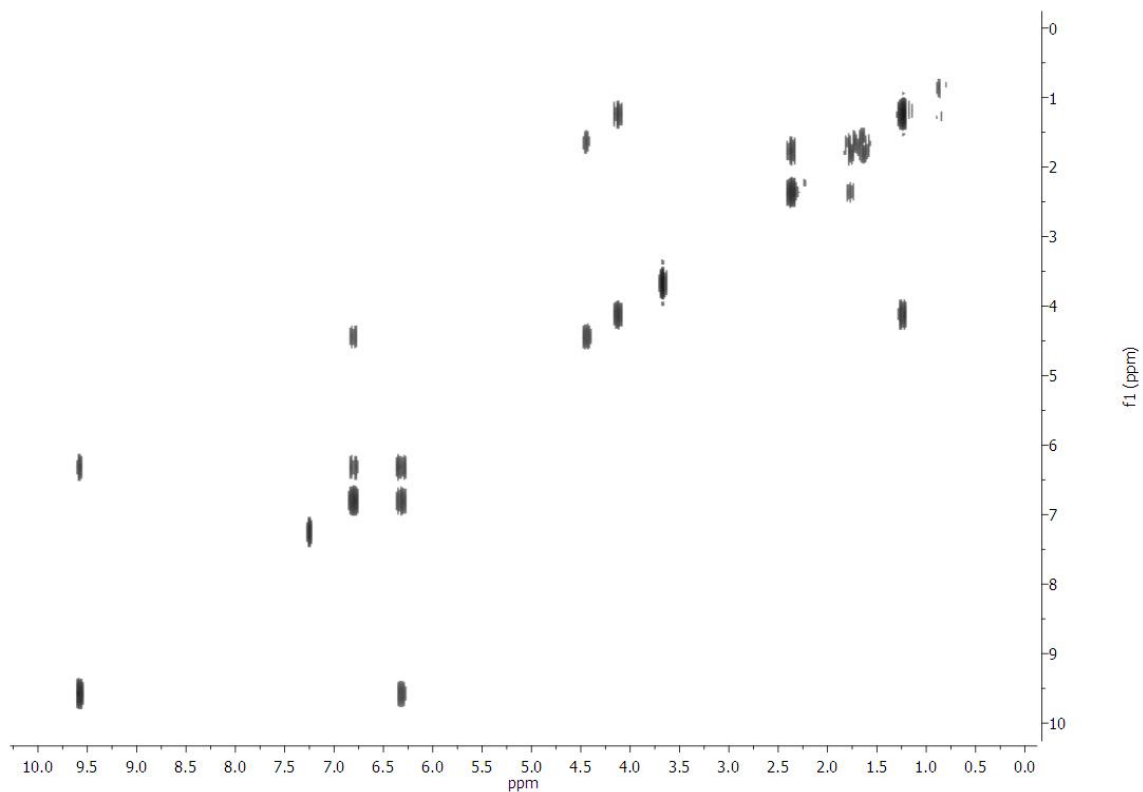

**Figure S22** The 400MHz gCOSY NMR (CDCl<sub>3</sub>) spectrum of (*E*)-methyl-5-hydroxy-8-oxooct-6-enoate (**16**)

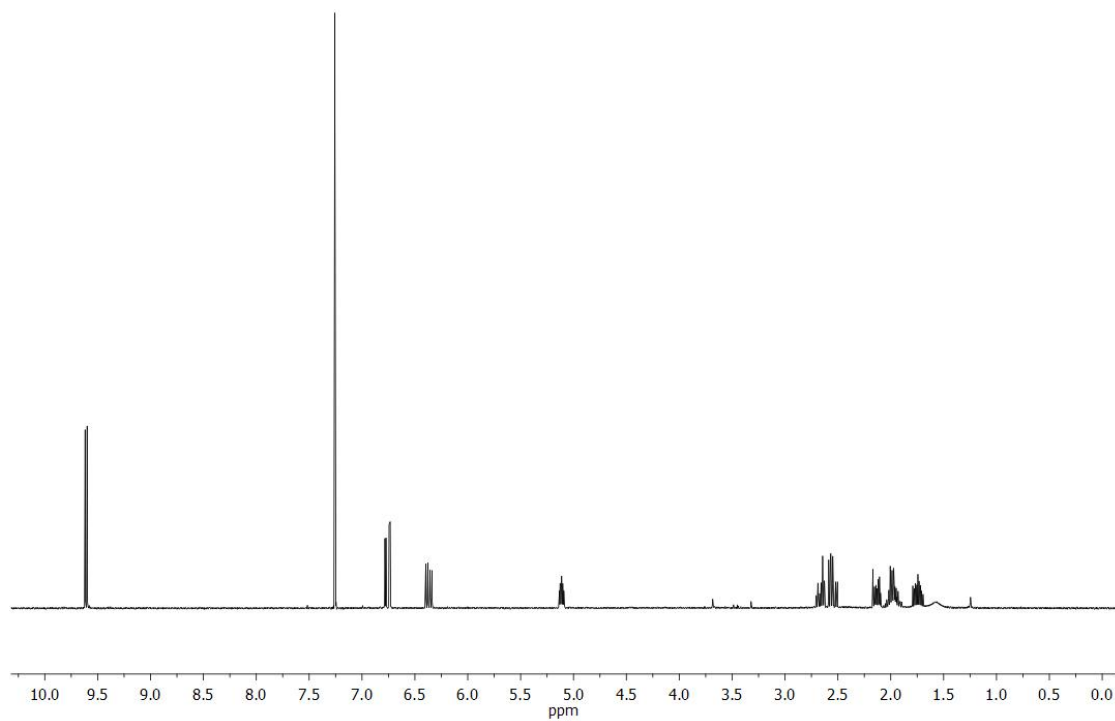

**Figure S23** The 400MHz <sup>1</sup>H NMR (CDCl<sub>3</sub>) spectrum of (*E*)-3-(6-oxotetrahydro-2H-pyran-2-yl)acrylaldehyde (**17**)

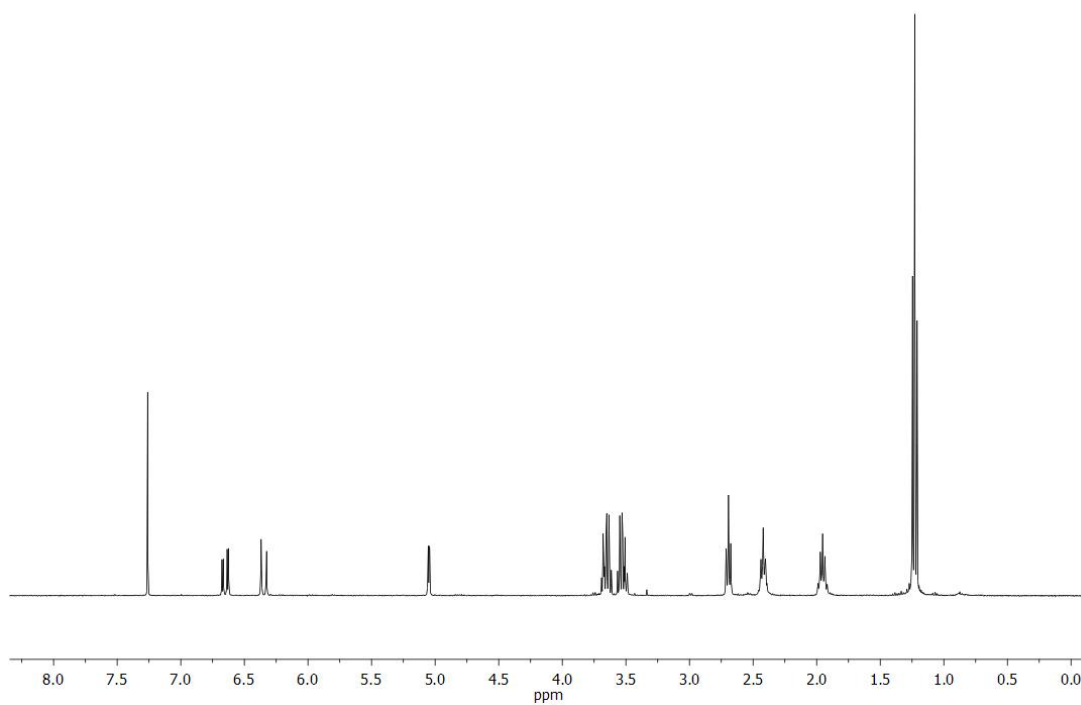



**Figure S24** The 400MHz  $^1\text{H}$  NMR ( $\text{CDCl}_3$ ) spectrum of (*E*)-8,8-diethoxy-5-oxooct-6-enoic acid (**3b**)

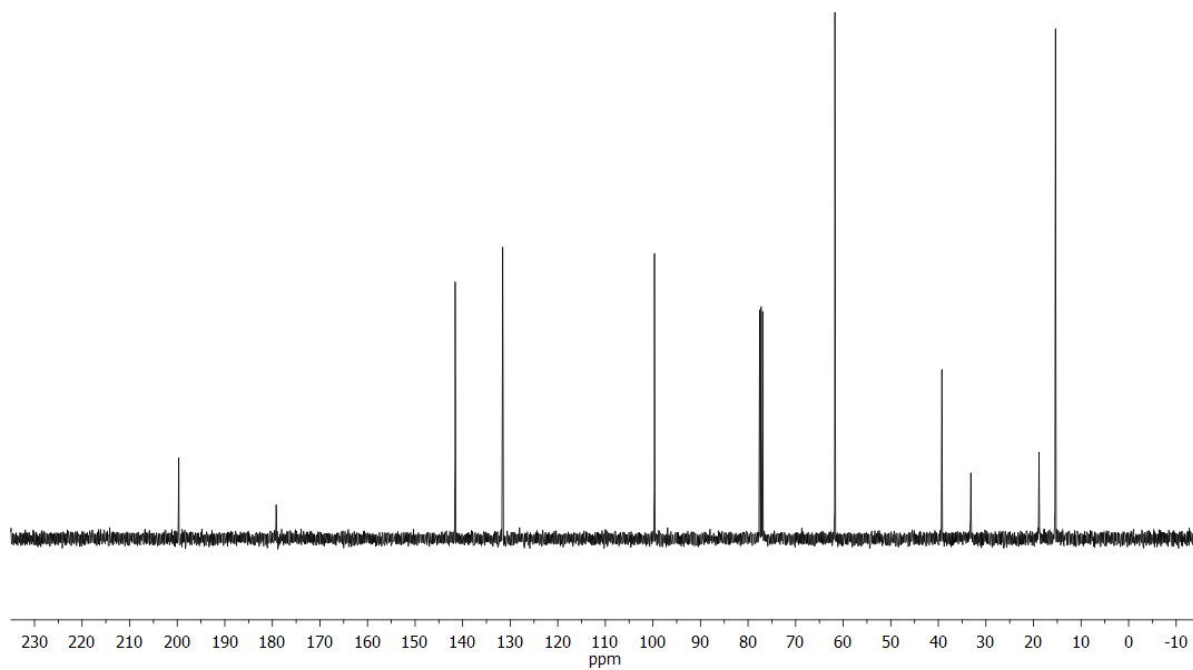

**Figure S25** The 100MHz  $^{13}\text{C}$  NMR ( $\text{CDCl}_3$ ) spectrum of (*E*)-8,8-diethoxy-5-oxooct-6-enoic acid (**3b**)

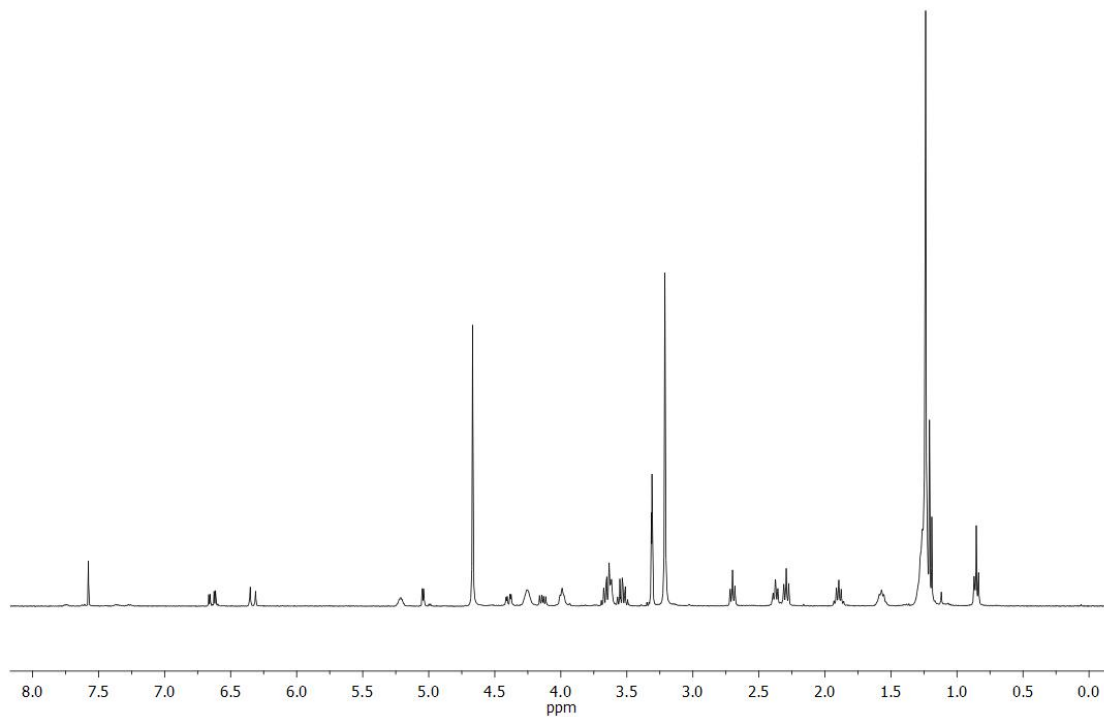

**Figure S26** The 400MHz  $^1\text{H}$  NMR ( $\text{CD}_3\text{OD}+\text{CDCl}_3$ ) spectrum of (*E*)-(8,8-diethoxy-5-oxooct-6-enoyl)-1-palmitoyl-*sn*-glycero-3-phosphatidylcholine (**18b**)

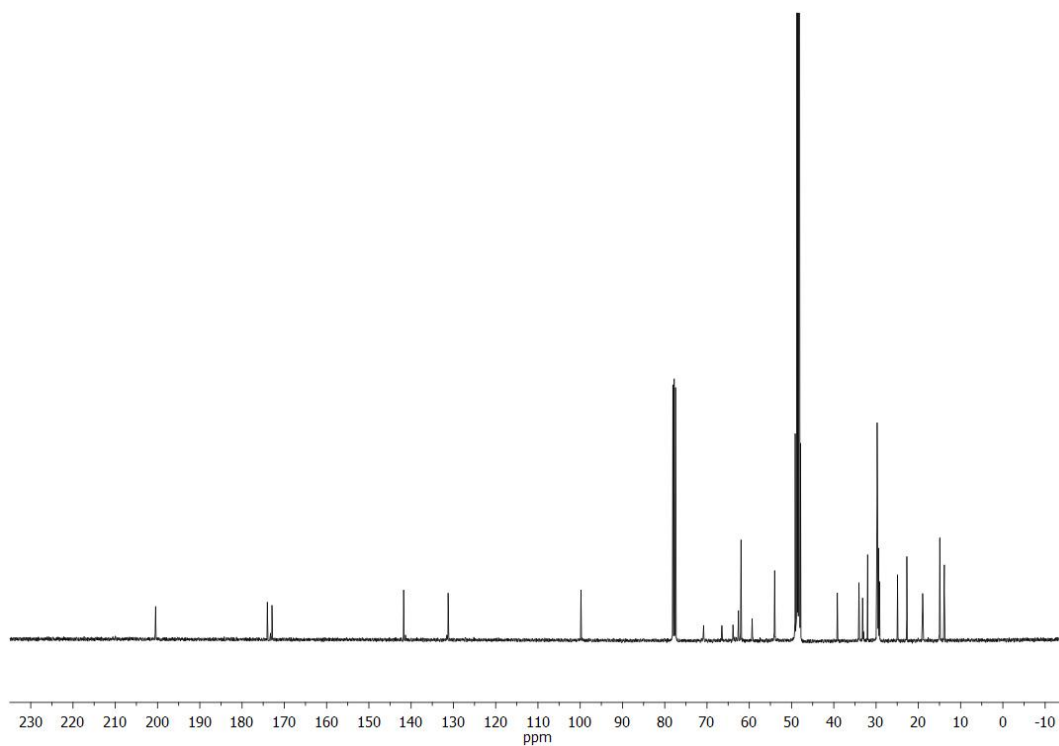

**Figure S27** The 100MHz  $^{13}\text{C}$  NMR ( $\text{CD}_3\text{OD}+\text{CDCl}_3$ ) spectrum of (*E*)-(8,8-diethoxy-5-oxooct-6-enoyl)-1-palmitoyl-*sn*-glycero-3-phosphatidylcholine (**18b**)

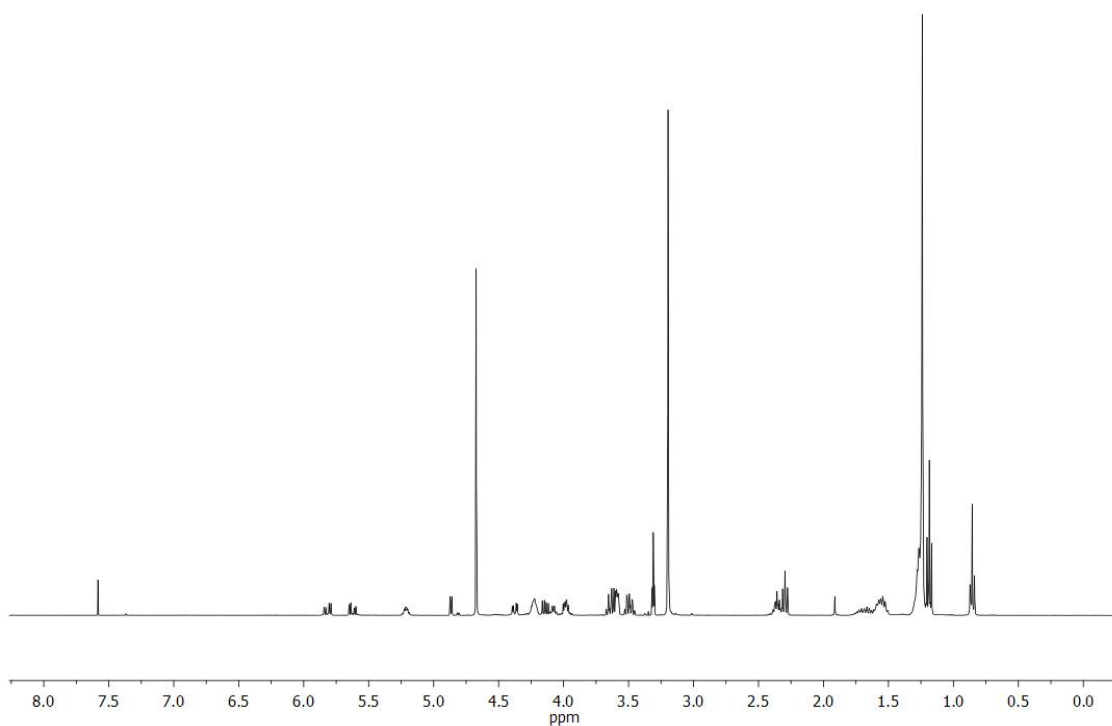

**Figure S28** The 400MHz  $^1\text{H}$  NMR ( $\text{CD}_3\text{OD}+\text{CDCl}_3$ ) spectrum of (*E*)-(5-hydroxy-8,8-diethoxyoct-6-enoyl)-1-palmitoyl-*sn*-glycero-3-phosphatidylcholine (**2b**)

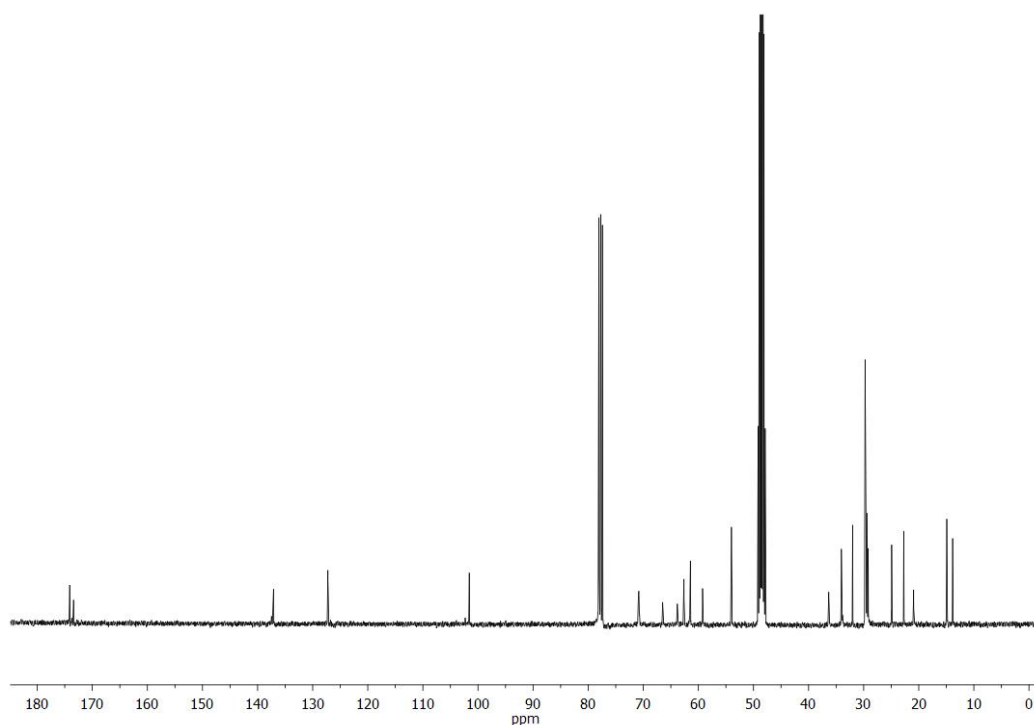

**Figure S29** The 100MHz  $^{13}\text{C}$  NMR ( $\text{CD}_3\text{OD}+\text{CDCl}_3$ ) spectrum of (*E*)-(5-hydroxy-8,8-diethoxyoct-6-enoyl)-1-palmitoyl-*sn*-glycero-3-phosphatidylcholine (**2b**)

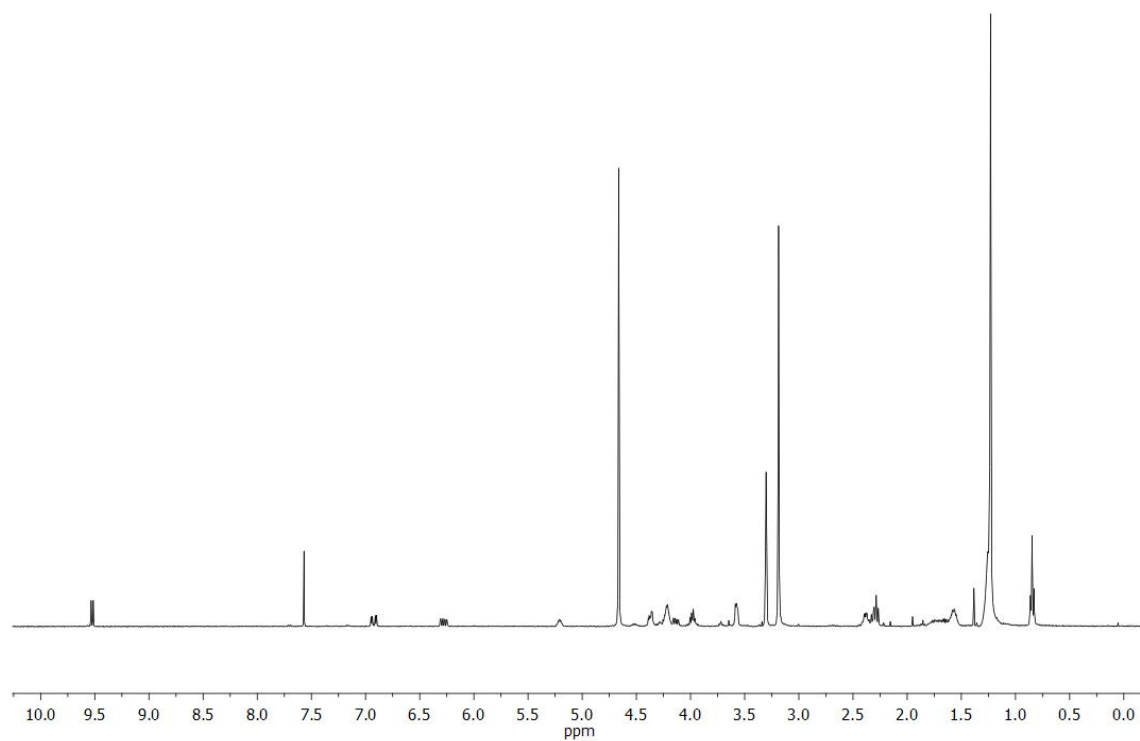

**Figure S30** The 400MHz  $^1\text{H}$  NMR ( $\text{CD}_3\text{OD}+\text{CDCl}_3$ ) spectrum of (*E*)-(5-hydroxy-8-oxooct-6-enoyl)-1-palmitoyl-*sn*-glycero-3-phosphatidylcholine (**HOOA-PC, 1b**)

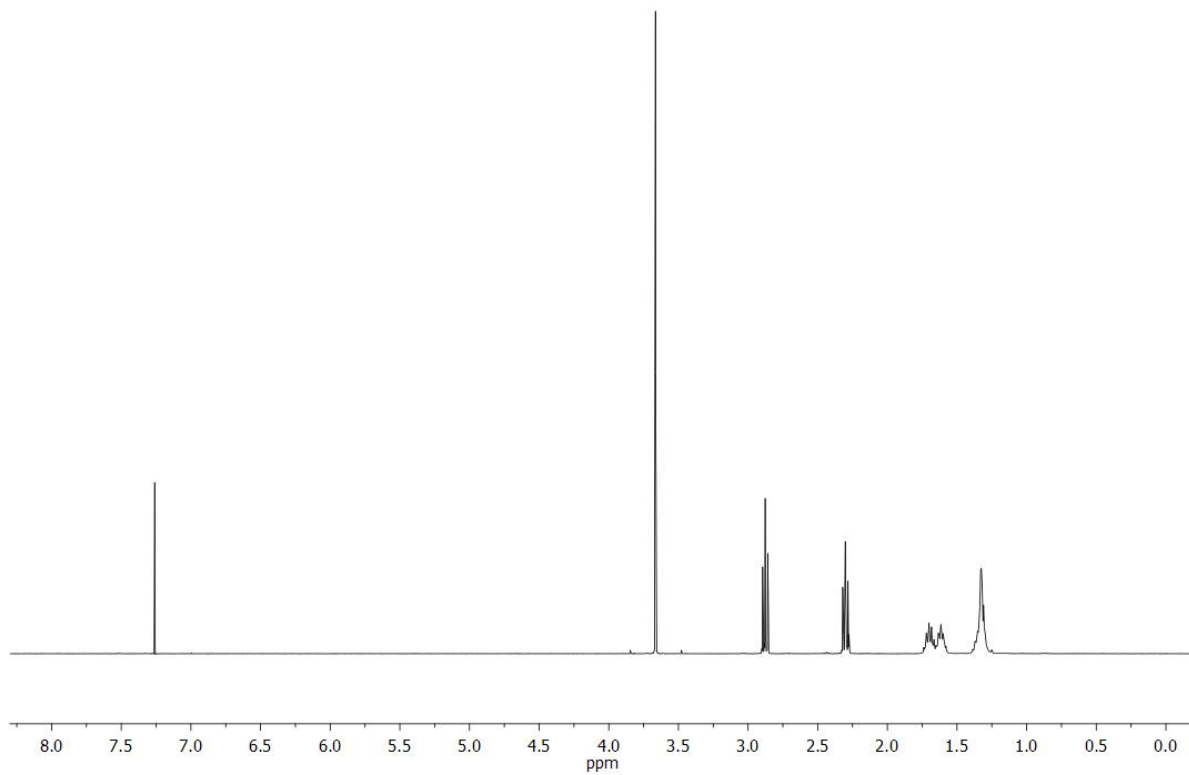

**Figure S31** The 400MHz  $^1\text{H}$  NMR ( $\text{CD}_3\text{OD}+\text{CDCl}_3$ ) spectrum of Methyl-9-(chlorocarbonyl)octanoate (**7b**)

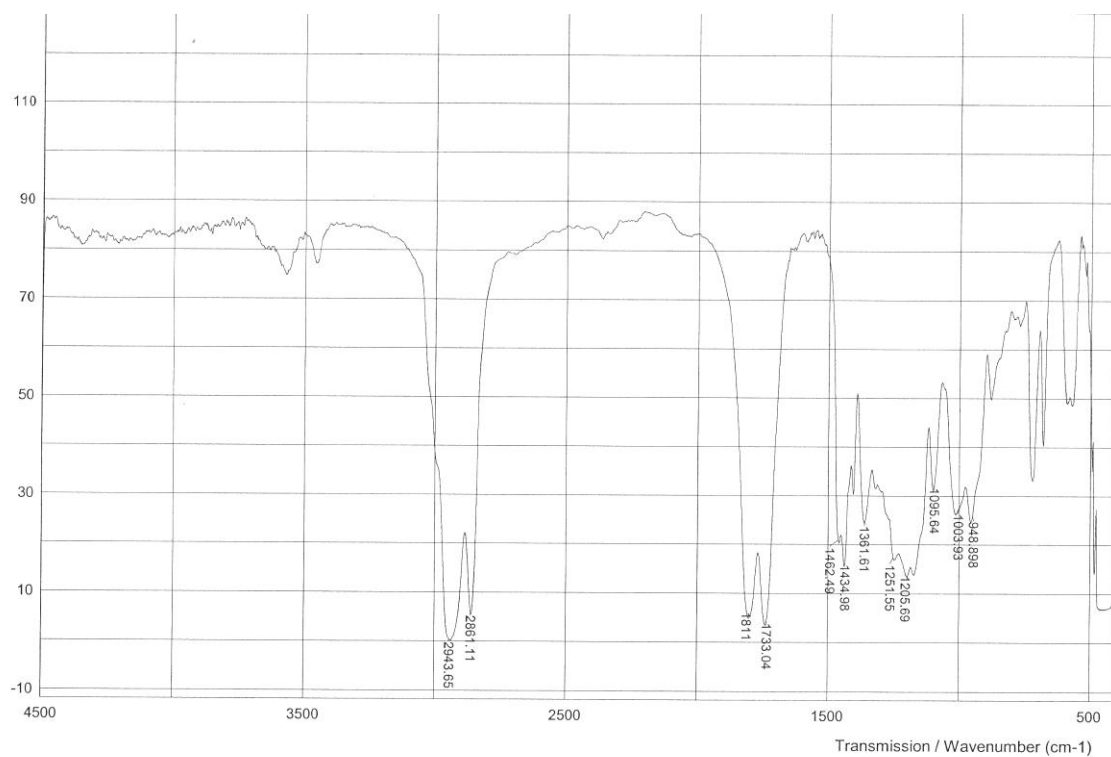

**Figure S32** The IR spectrum of Methyl-9-(chlorocarbonyl)octanoate (**7b**)

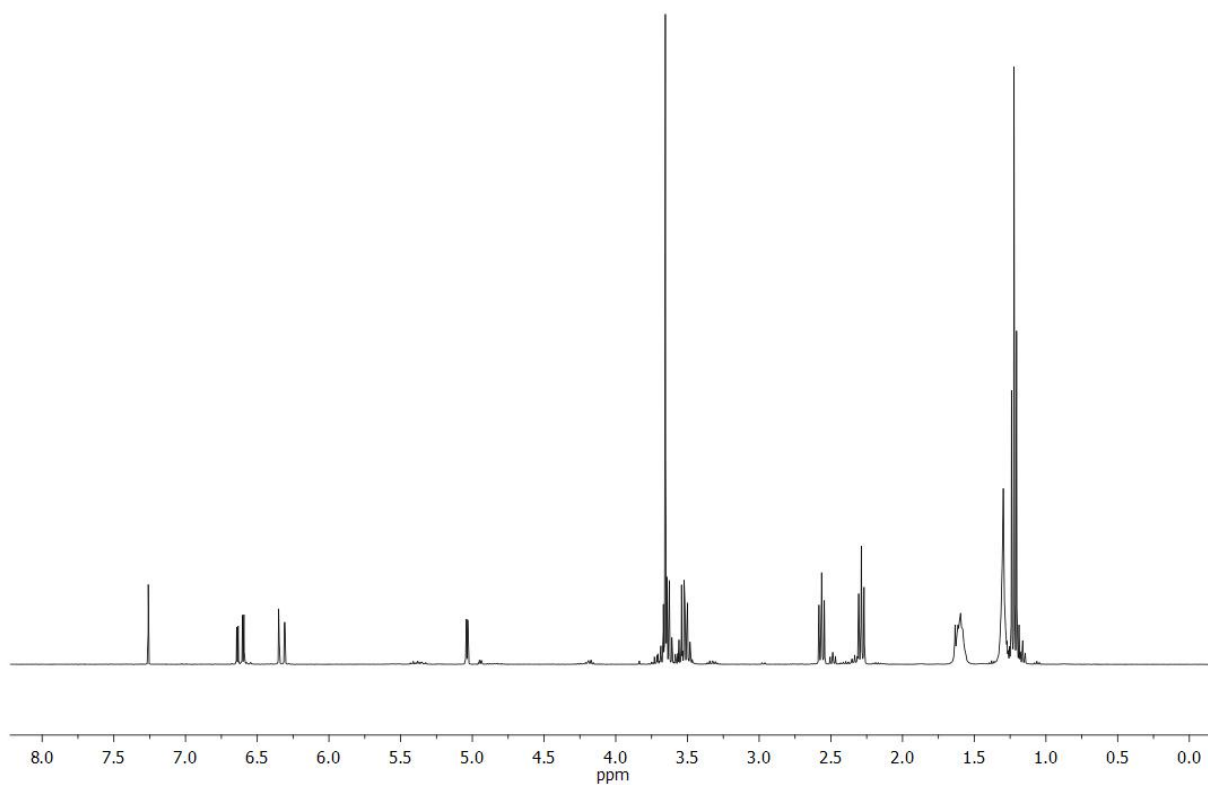

**Figure S33** The 400MHz <sup>1</sup>H NMR (CDCl<sub>3</sub>) spectrum of Methyl (*E*)-12,12-diethoxy-9-oxodec-10-enoate (**14c**)

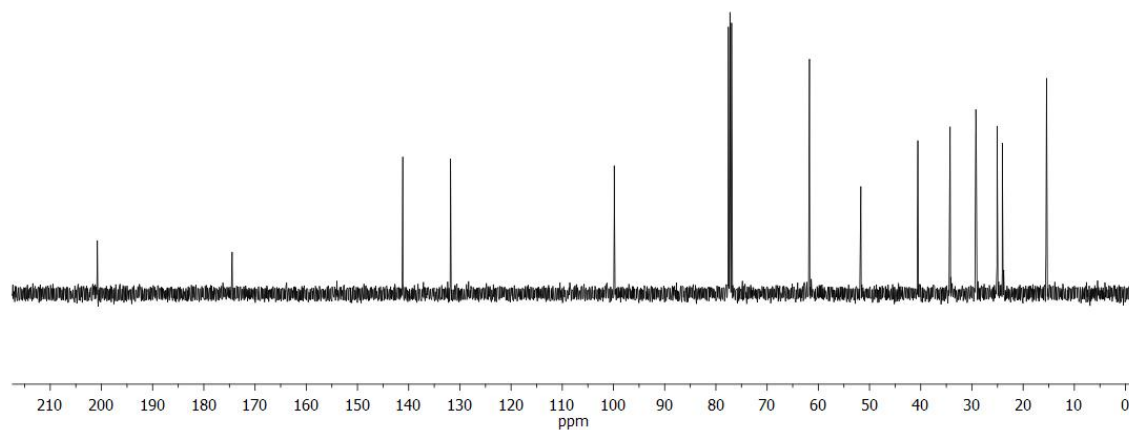

**Figure S34** The 100MHz  $^{13}\text{C}$  NMR ( $\text{CDCl}_3$ ) spectrum of Methyl (*E*)-12,12-diethoxy-9-oxodec-10-enoate (**14c**)

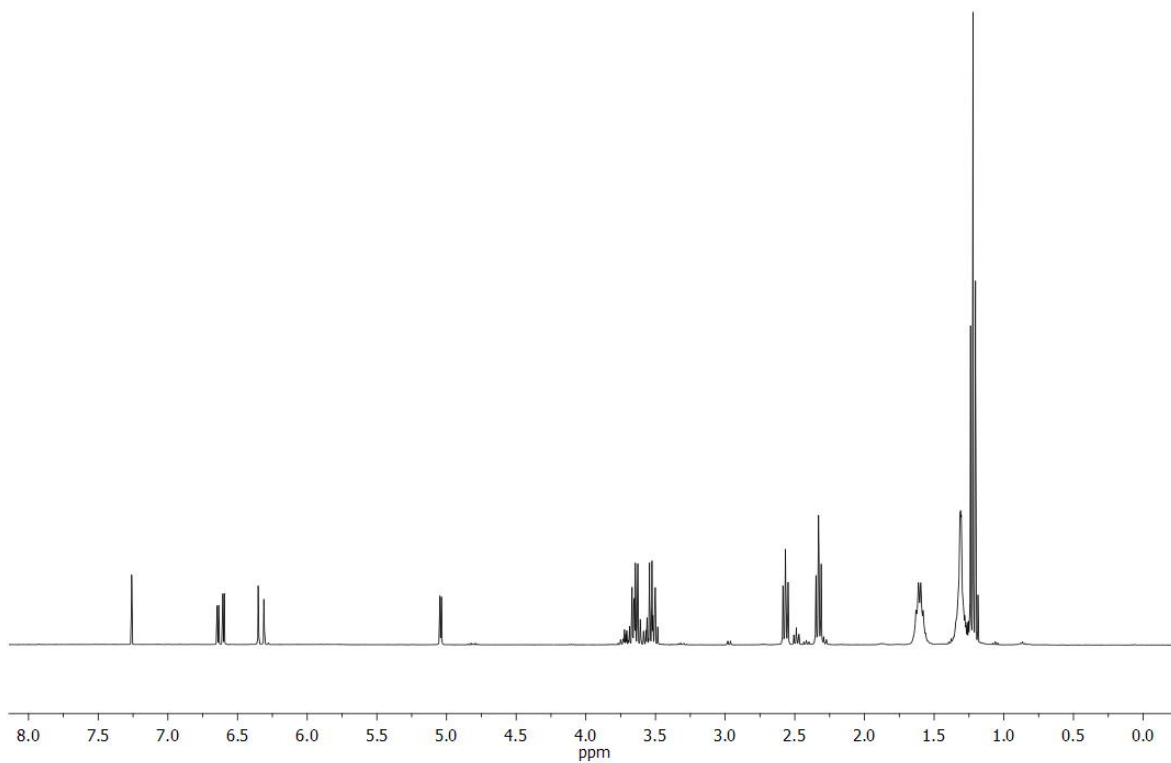

**Figure S35** The 400MHz  $^1\text{H}$  NMR ( $\text{CDCl}_3$ ) spectrum of (*E*)-12,12-diethoxy-9-oxodec-10-enoic acid (**3c**)

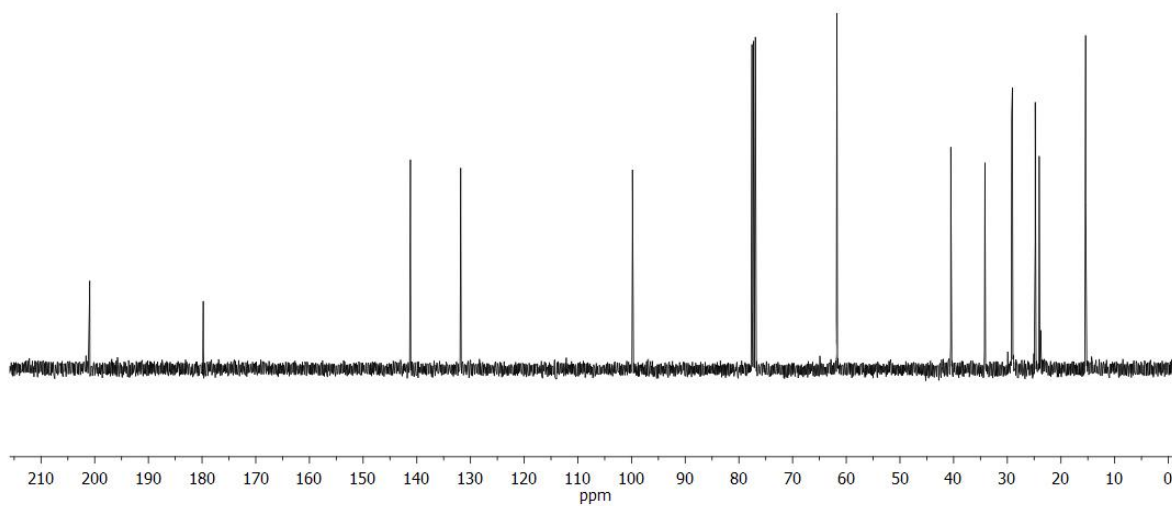

**Figure S36** The 100MHz  $^{13}\text{C}$  NMR ( $\text{CDCl}_3$ ) spectrum of (*E*)-12,12-diethoxy-9-oxodec-10-enoic acid (**3c**)

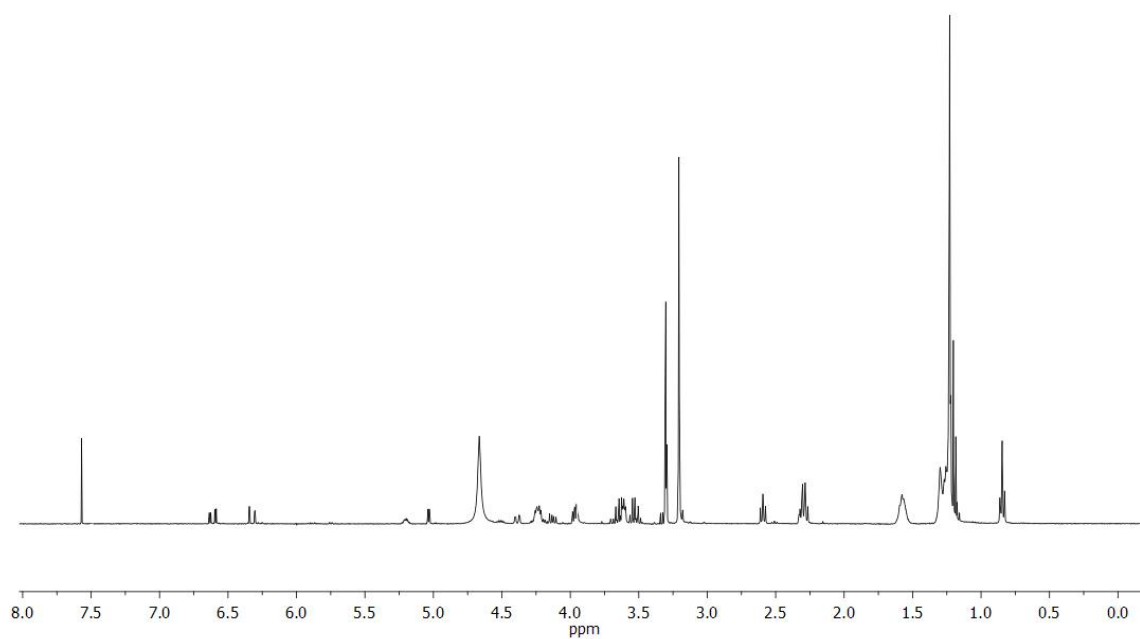

**Figure S37** The 400MHz  $^1\text{H}$  NMR ( $\text{CD}_3\text{OD}+\text{CDCl}_3$ ) spectrum of (*E*)-(12,12-diethoxy-9-oxodec-10-enoyl)-1-palmitoyl-*sn*-glycero-3-phosphatidylcholine (**18c**)

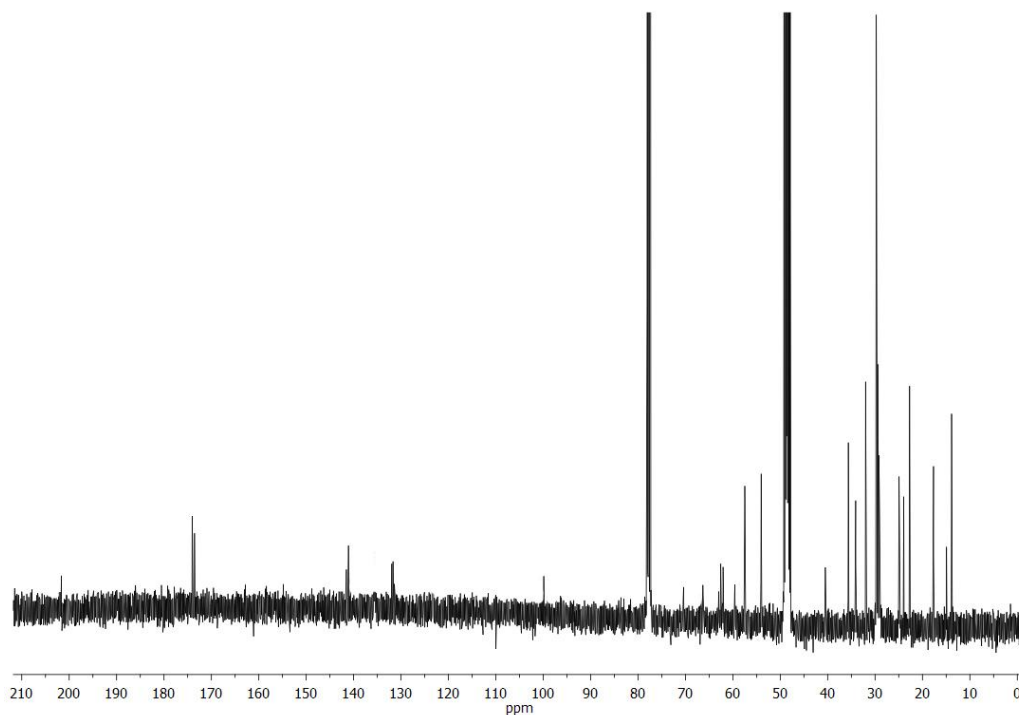

**Figure S38** The 100MHz  $^{13}\text{C}$  NMR ( $\text{CD}_3\text{OD}+\text{CDCl}_3$ ) spectrum of (*E*)-(12,12-diethoxy-9-oxodec-10-enoyl)-1-palmitoyl-*sn*-glycero-3-phosphatidylcholine (**18c**)

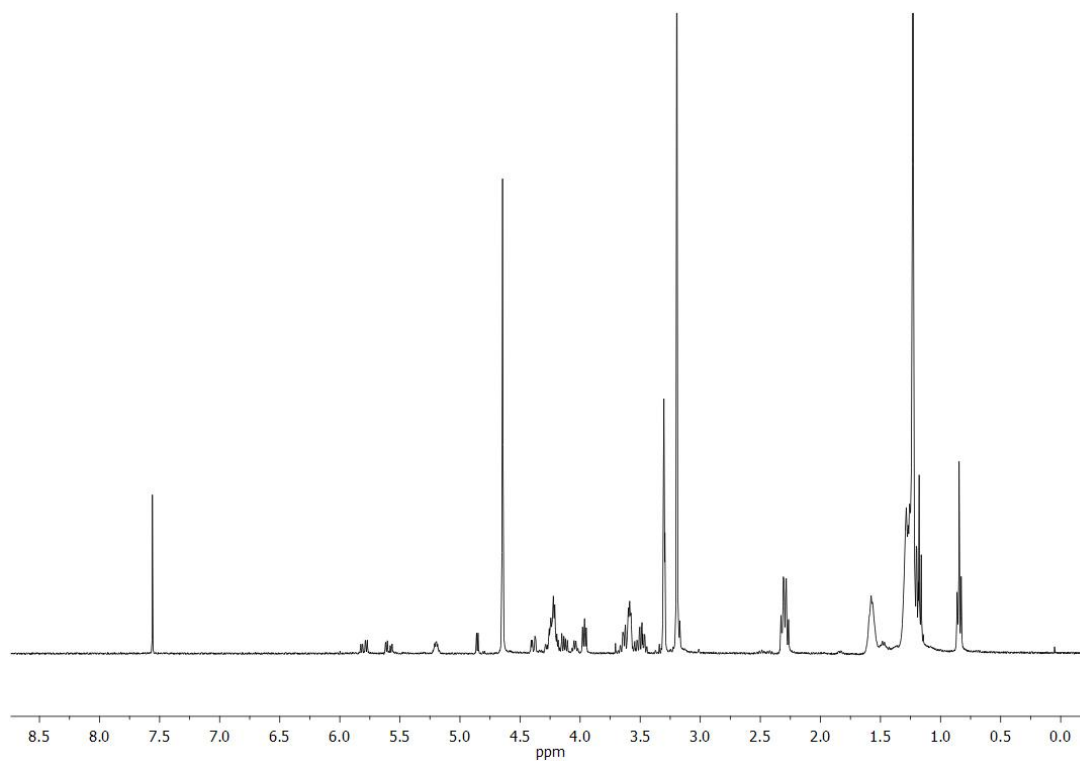

**Figure S39** The 400MHz  $^1\text{H}$  NMR ( $\text{CD}_3\text{OD}+\text{CDCl}_3$ ) spectrum of (*E*)-(9-hydroxy-12,12-diethoxydec-10-enoyl)-1-palmitoyl-*sn*-glycero-3-phosphatidylcholine (**2c**)



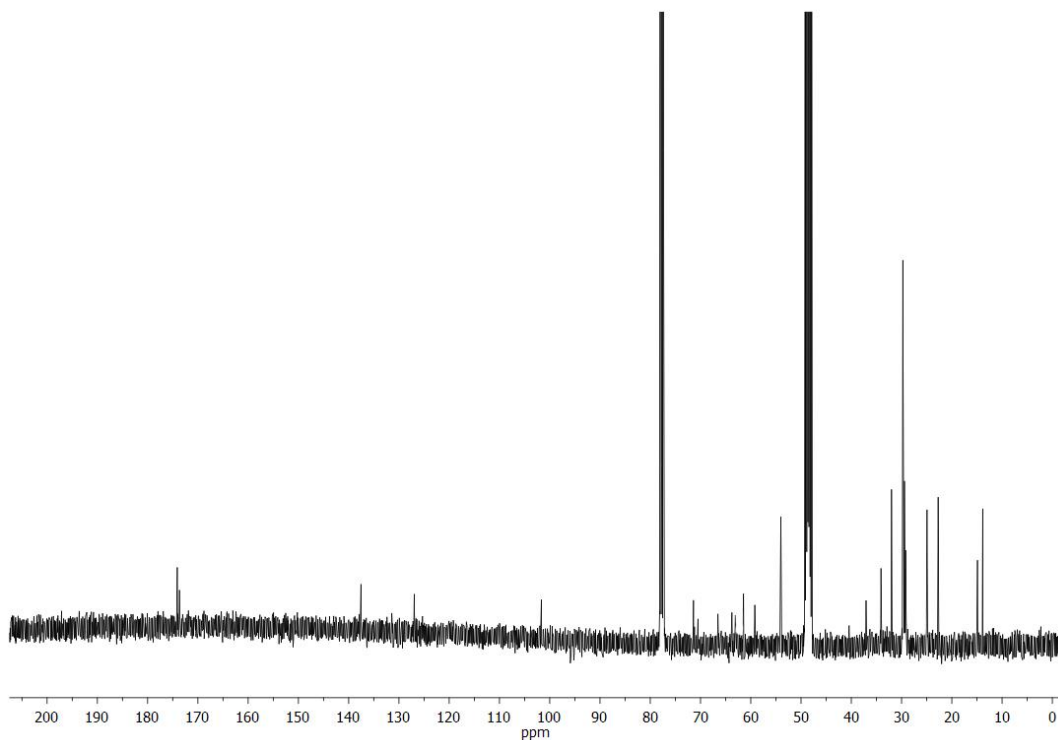

**Figure S40** The 400MHz  $^1\text{H}$  NMR ( $\text{CD}_3\text{OD}+\text{CDCl}_3$ ) spectrum of (*E*)-(9-hydroxy-12,12-diethoxydec-10-enoyl)-1-palmitoyl-*sn*-glycero-3-phosphatidylcholine (**2c**)

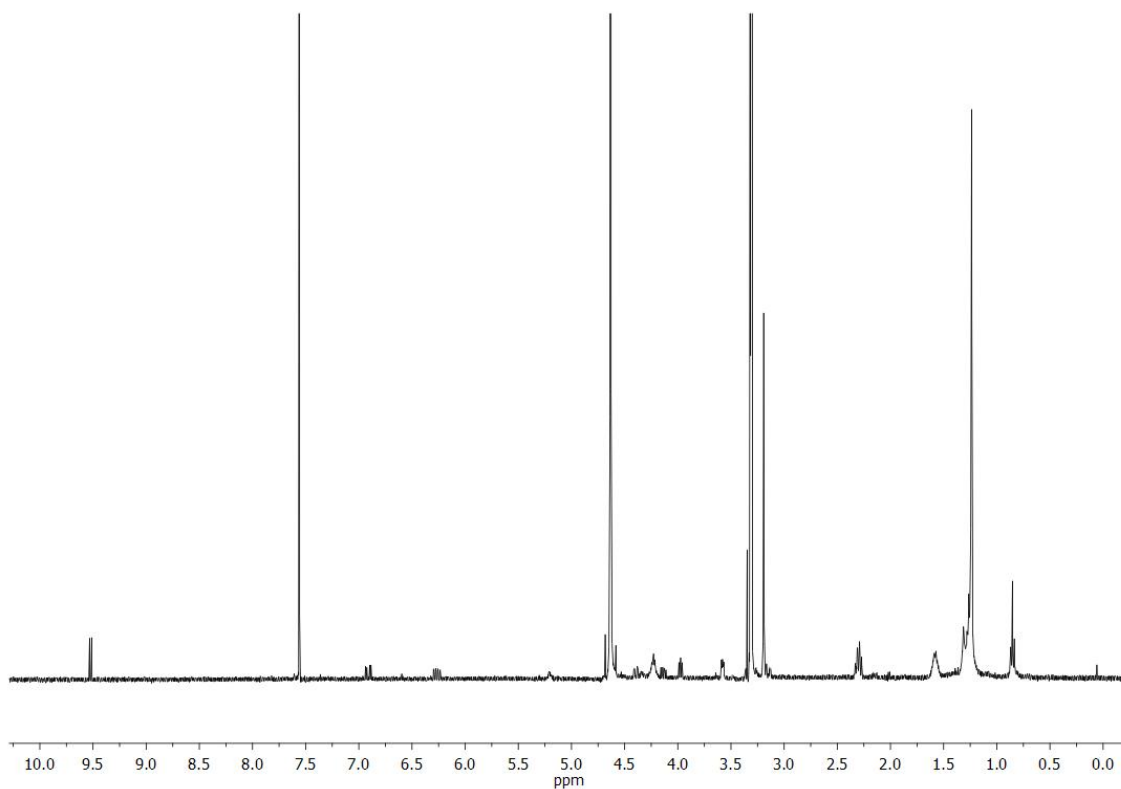

**Figure S41** The 400MHz  $^1\text{H}$  NMR ( $\text{CD}_3\text{OD}+\text{CDCl}_3$ ) spectrum of (*E*)-(9-hydroxy-12-oxodec-10-enoyl)-1-palmitoyl-*sn*-glycero-3-phosphatidylcholine (**HODA-PC, 1c**)
